# Supplementary material for: Synthesis of the structure proposed for the natural allenic antibiotic scorodonin
Source: Royal Society of Chemistry journal article supplement (doi:10.1039/c000481b), 2010-01-01
Supplement: c000481b.pdf [file c000481b.pdf]

*Electronic Supplementary Information*

**Synthesis of the Structure Proposed for the Natural Allenic Antibiotic Scorodonin**

Ya-Jun Jian and Yikang Wu\*

State Key Laboratory of Bioorganic and Natural Products Chemistry,  
Shanghai Institute of Organic Chemistry, Chinese Academy of Sciences

*E-mail: yikangwu@mail.sioc.ac.cn*

**Table of Contents**

|                                         |      |
|-----------------------------------------|------|
| <sup>1</sup> H NMR for <b>7</b> .....   | S 2  |
| <sup>13</sup> C NMR for <b>7</b> .....  | S 3  |
| <sup>1</sup> H NMR for <b>8</b> .....   | S 4  |
| <sup>13</sup> C NMR for <b>8</b> .....  | S 5  |
| <sup>1</sup> H NMR for <b>9</b> .....   | S 6  |
| <sup>13</sup> C NMR for <b>9</b> .....  | S 7  |
| <sup>1</sup> H NMR for <b>1</b> .....   | S 8  |
| <sup>13</sup> C NMR for <b>1</b> .....  | S 9  |
| <sup>1</sup> H NMR for <b>11</b> .....  | S 10 |
| <sup>13</sup> C NMR for <b>11</b> ..... | S 11 |
| <sup>1</sup> H NMR for <b>12</b> .....  | S 12 |
| <sup>13</sup> C NMR for <b>12</b> ..... | S 13 |
| <sup>1</sup> H NMR for <b>13</b> .....  | S 14 |
| <sup>13</sup> C NMR for <b>13</b> ..... | S 15 |
| <sup>1</sup> H NMR for <b>10</b> .....  | S 16 |
| <sup>13</sup> C NMR for <b>10</b> ..... | S 17 |
| <sup>1</sup> H NMR for <b>8'</b> .....  | S 18 |
| <sup>13</sup> C NMR for <b>8'</b> ..... | S 19 |
| HPLC for <b>7</b> .....                 | S 20 |
| HPLC for <b>8'</b> .....                | S 21 |

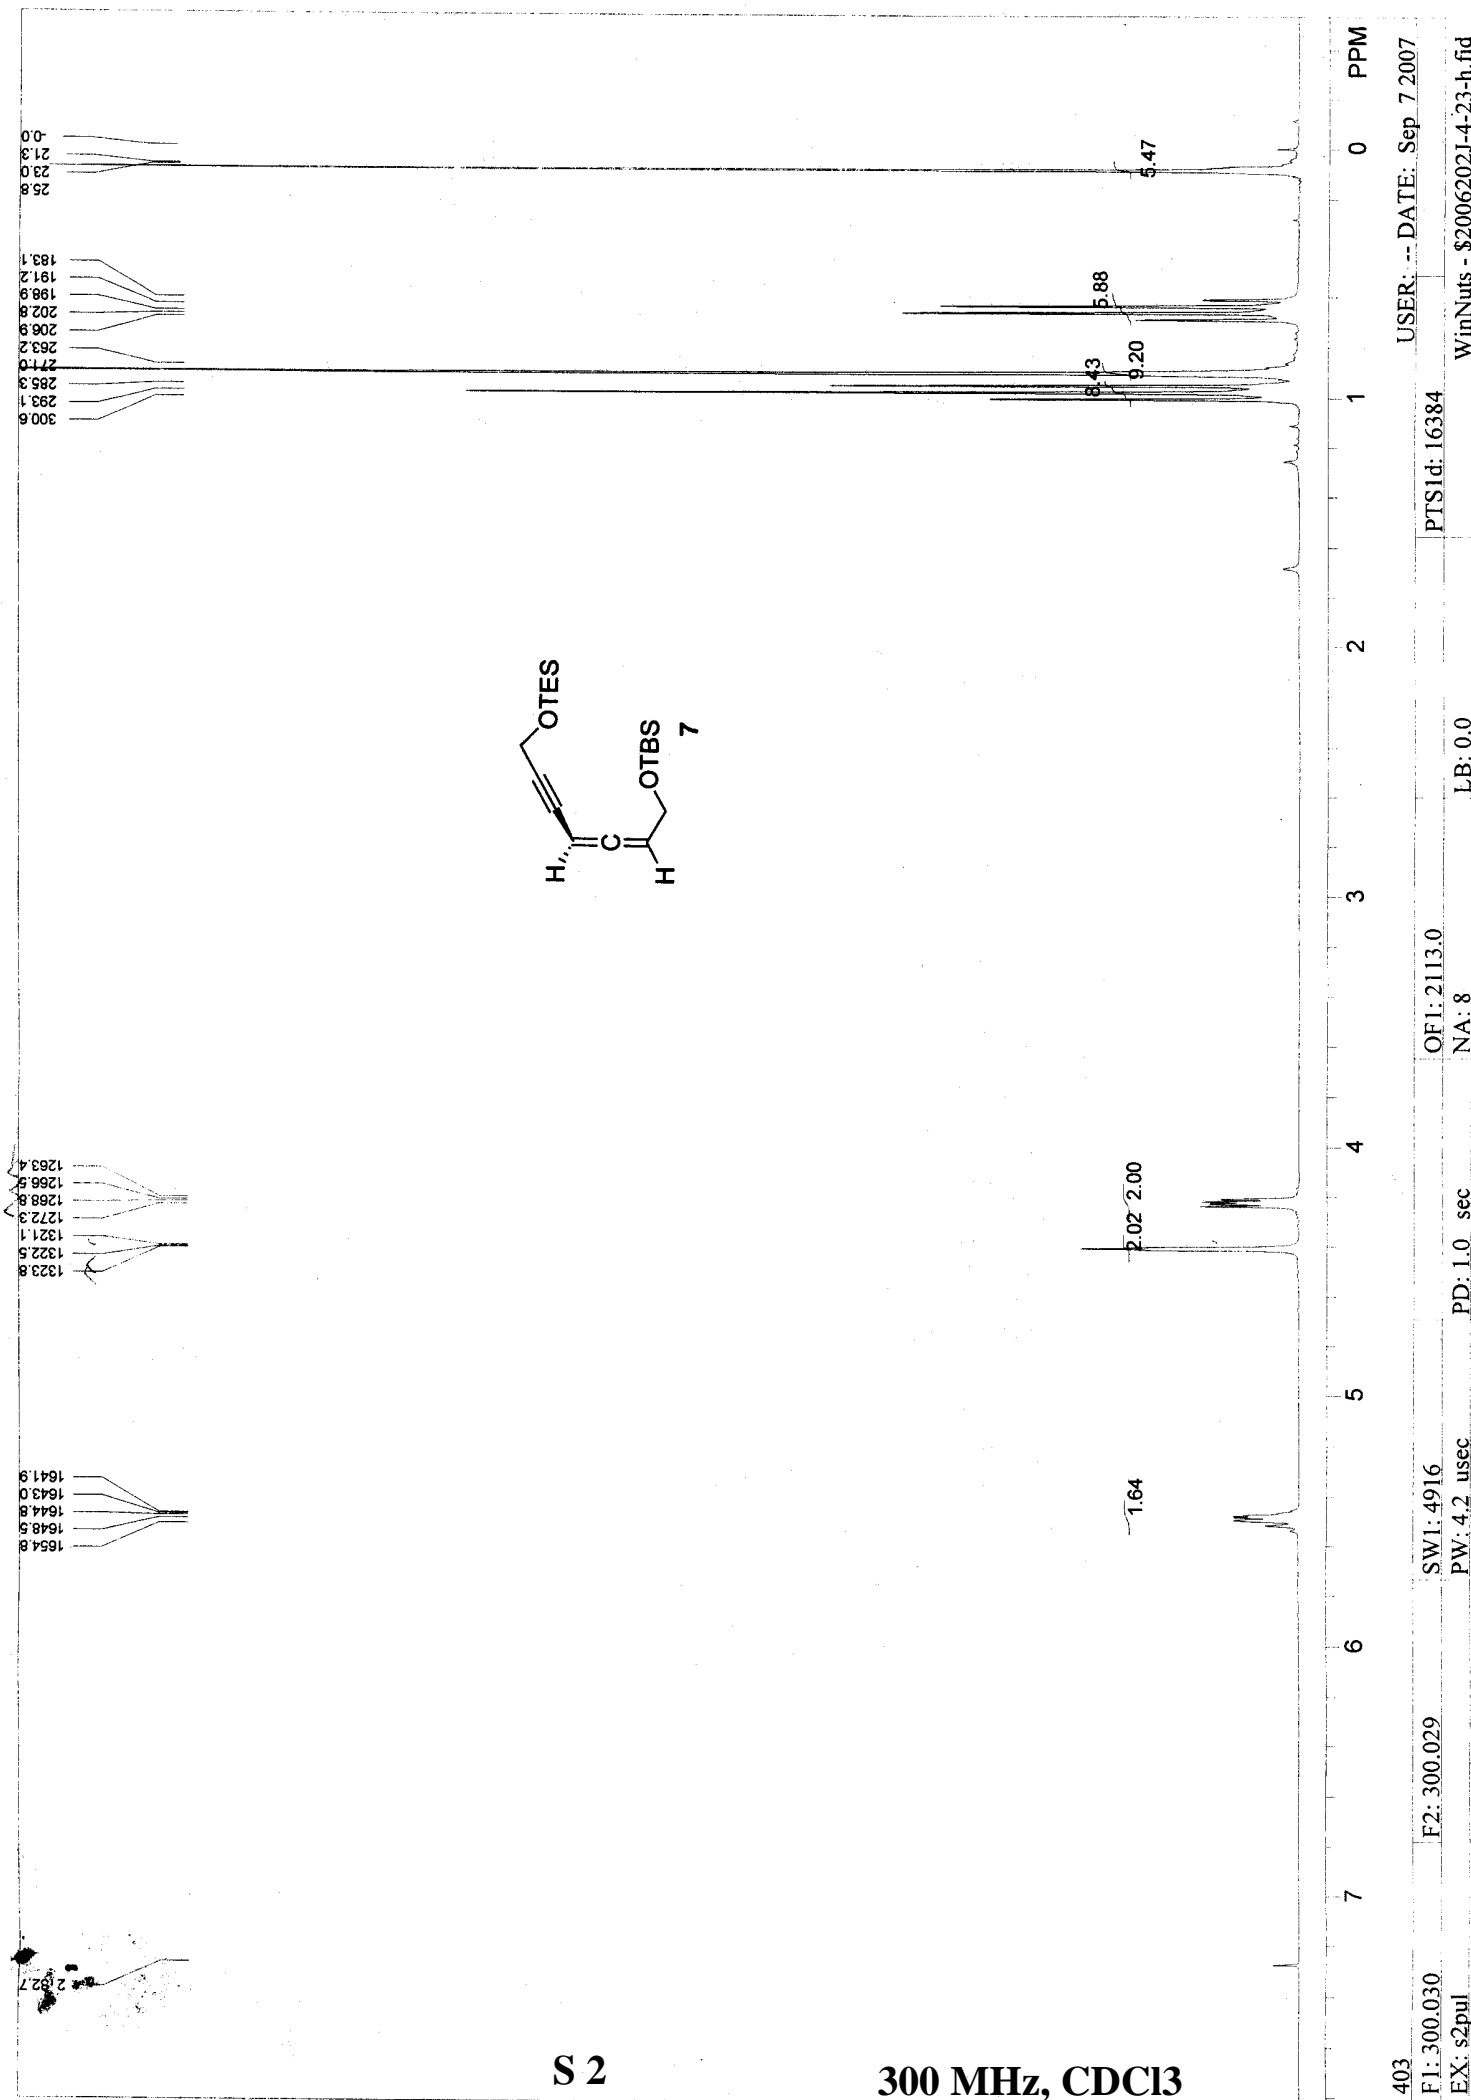

S 2

300 MHz, CDCl<sub>3</sub>

403

F1: 300.030

F2: 300.029

SW1: 4916

PD: 1.0 sec

OF1: 2113.0

LB: 0.0

PTS1d: 16384

USER: -- DATE: Sep 7 2007

EX: s2pul

WinNuts - \$2006202J-4-23-h.fid

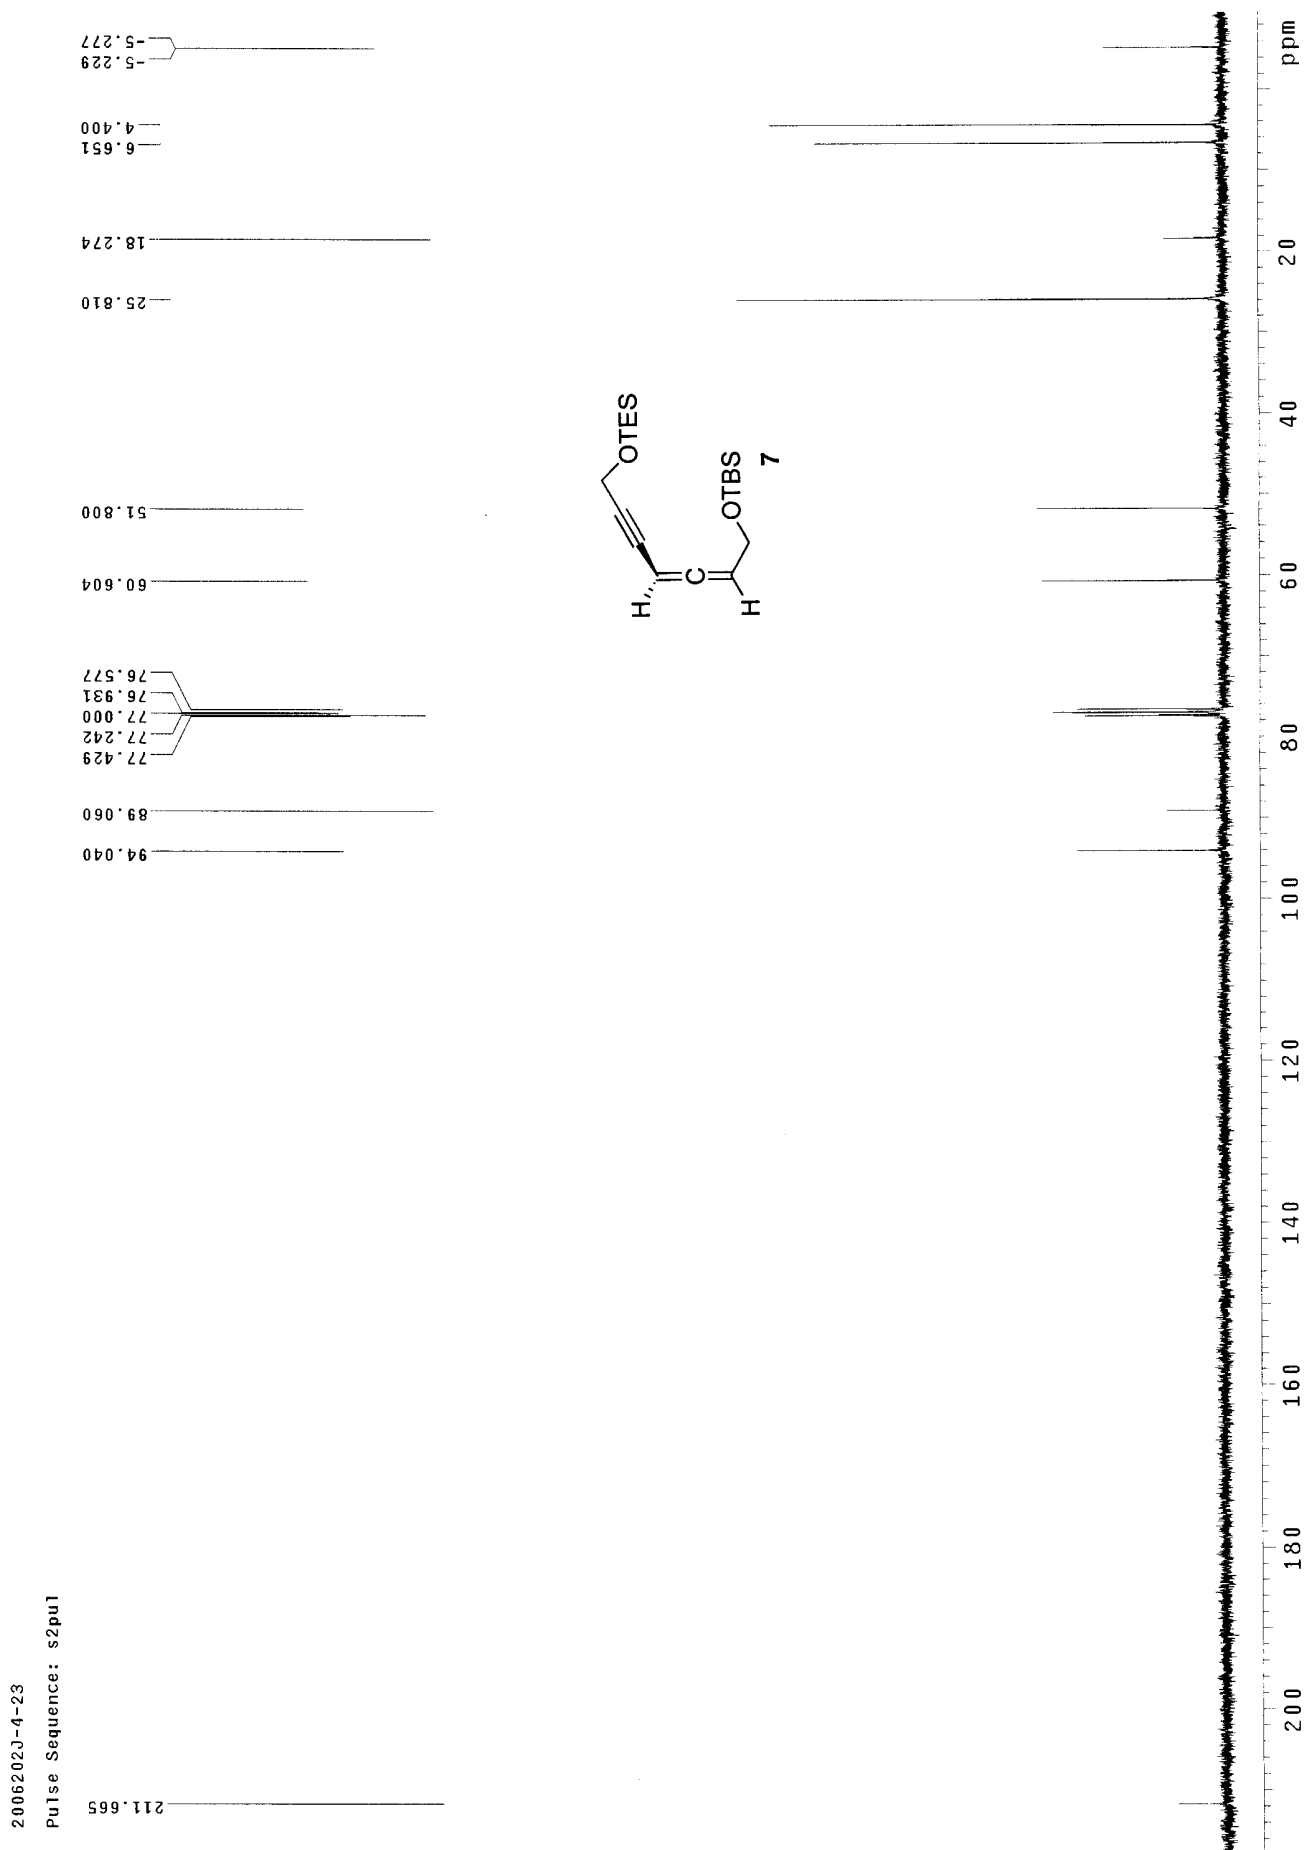

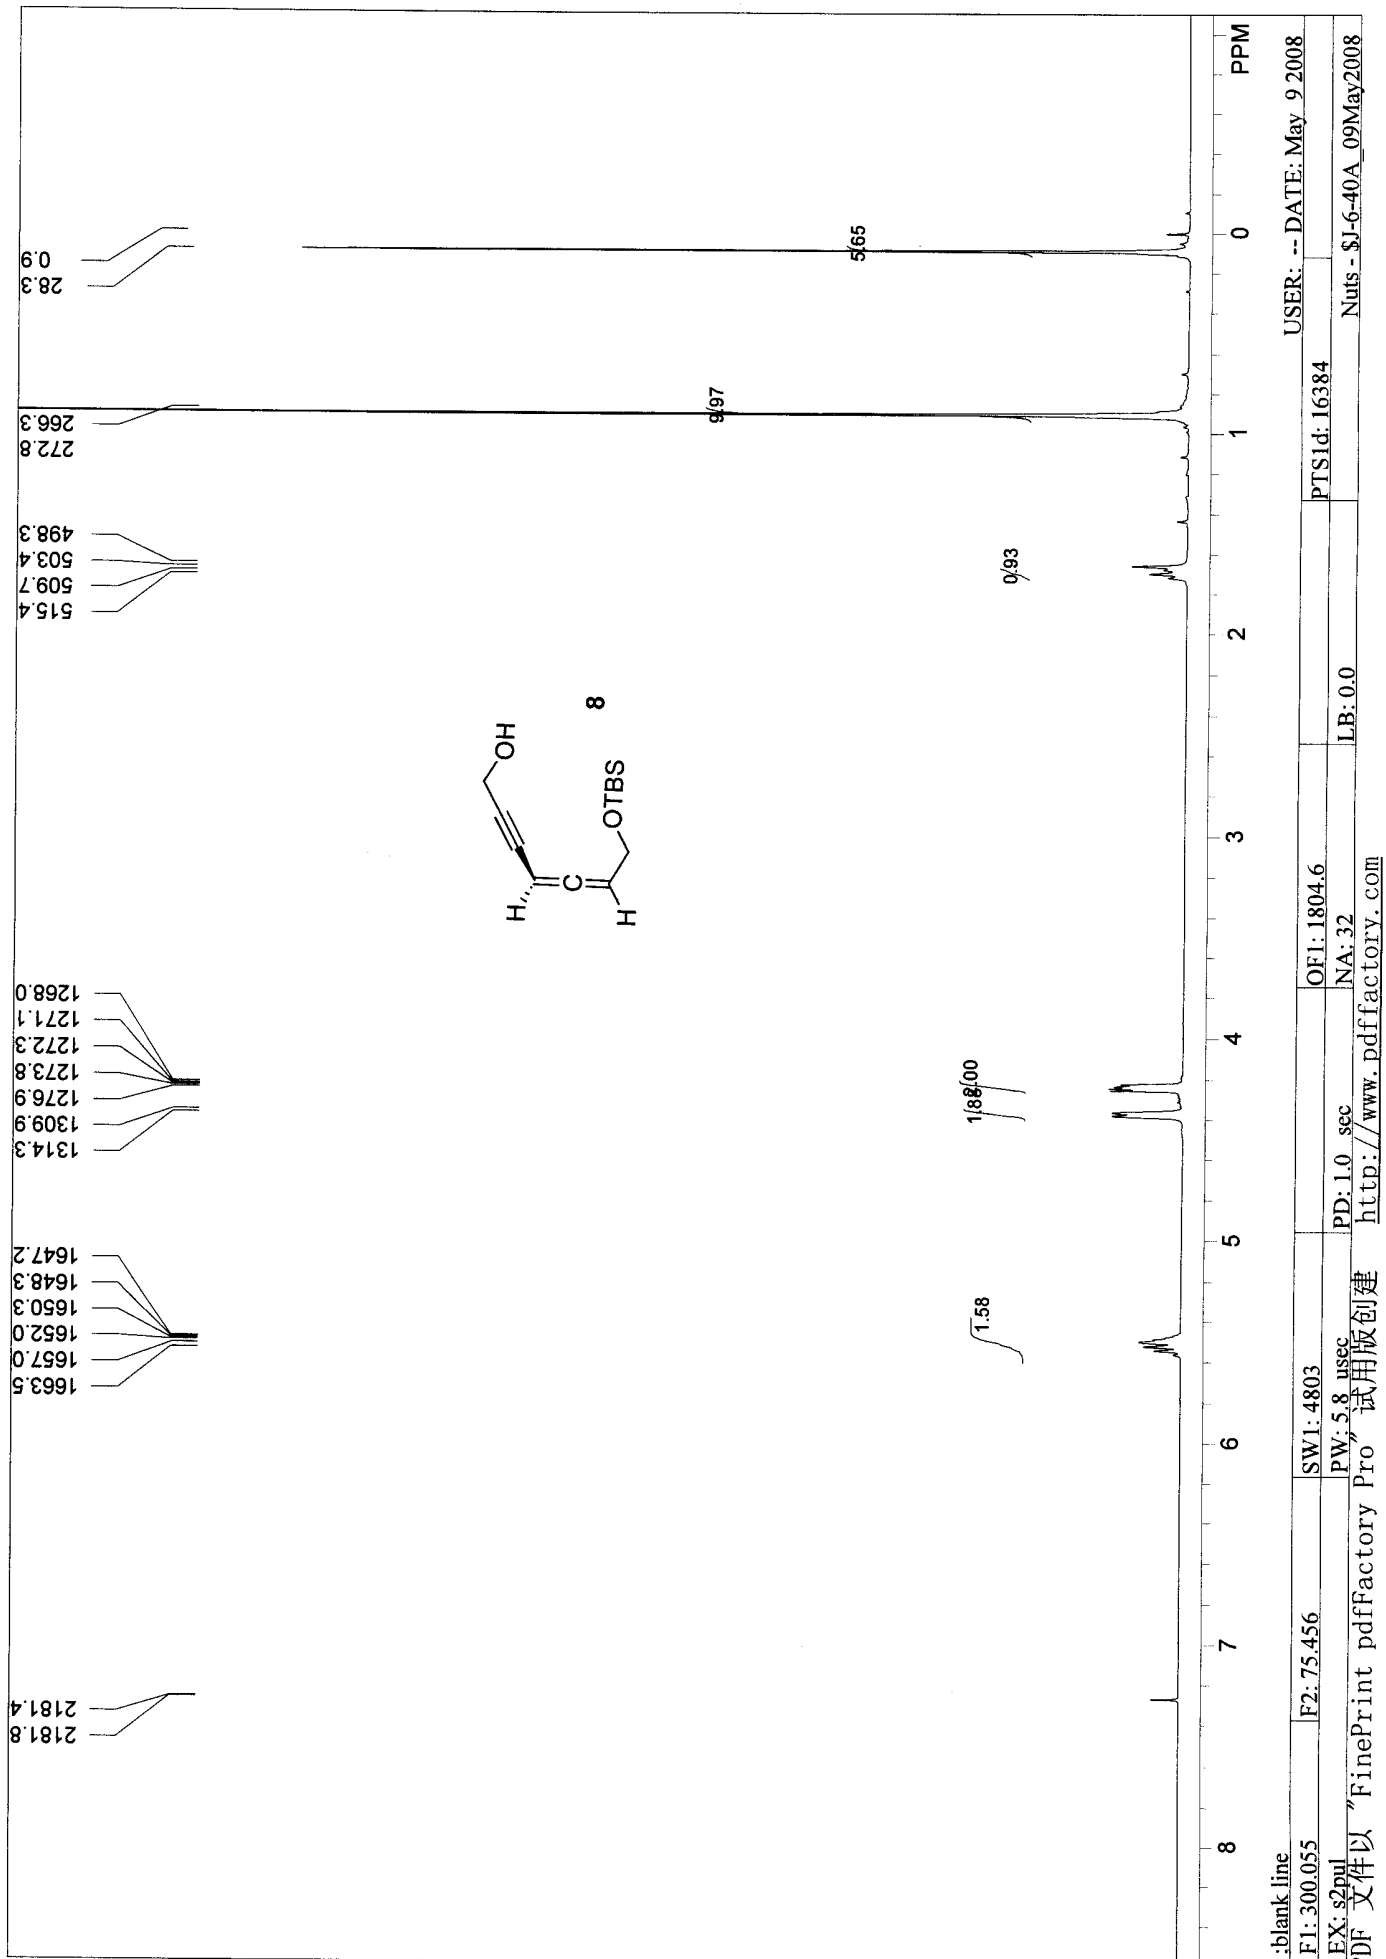

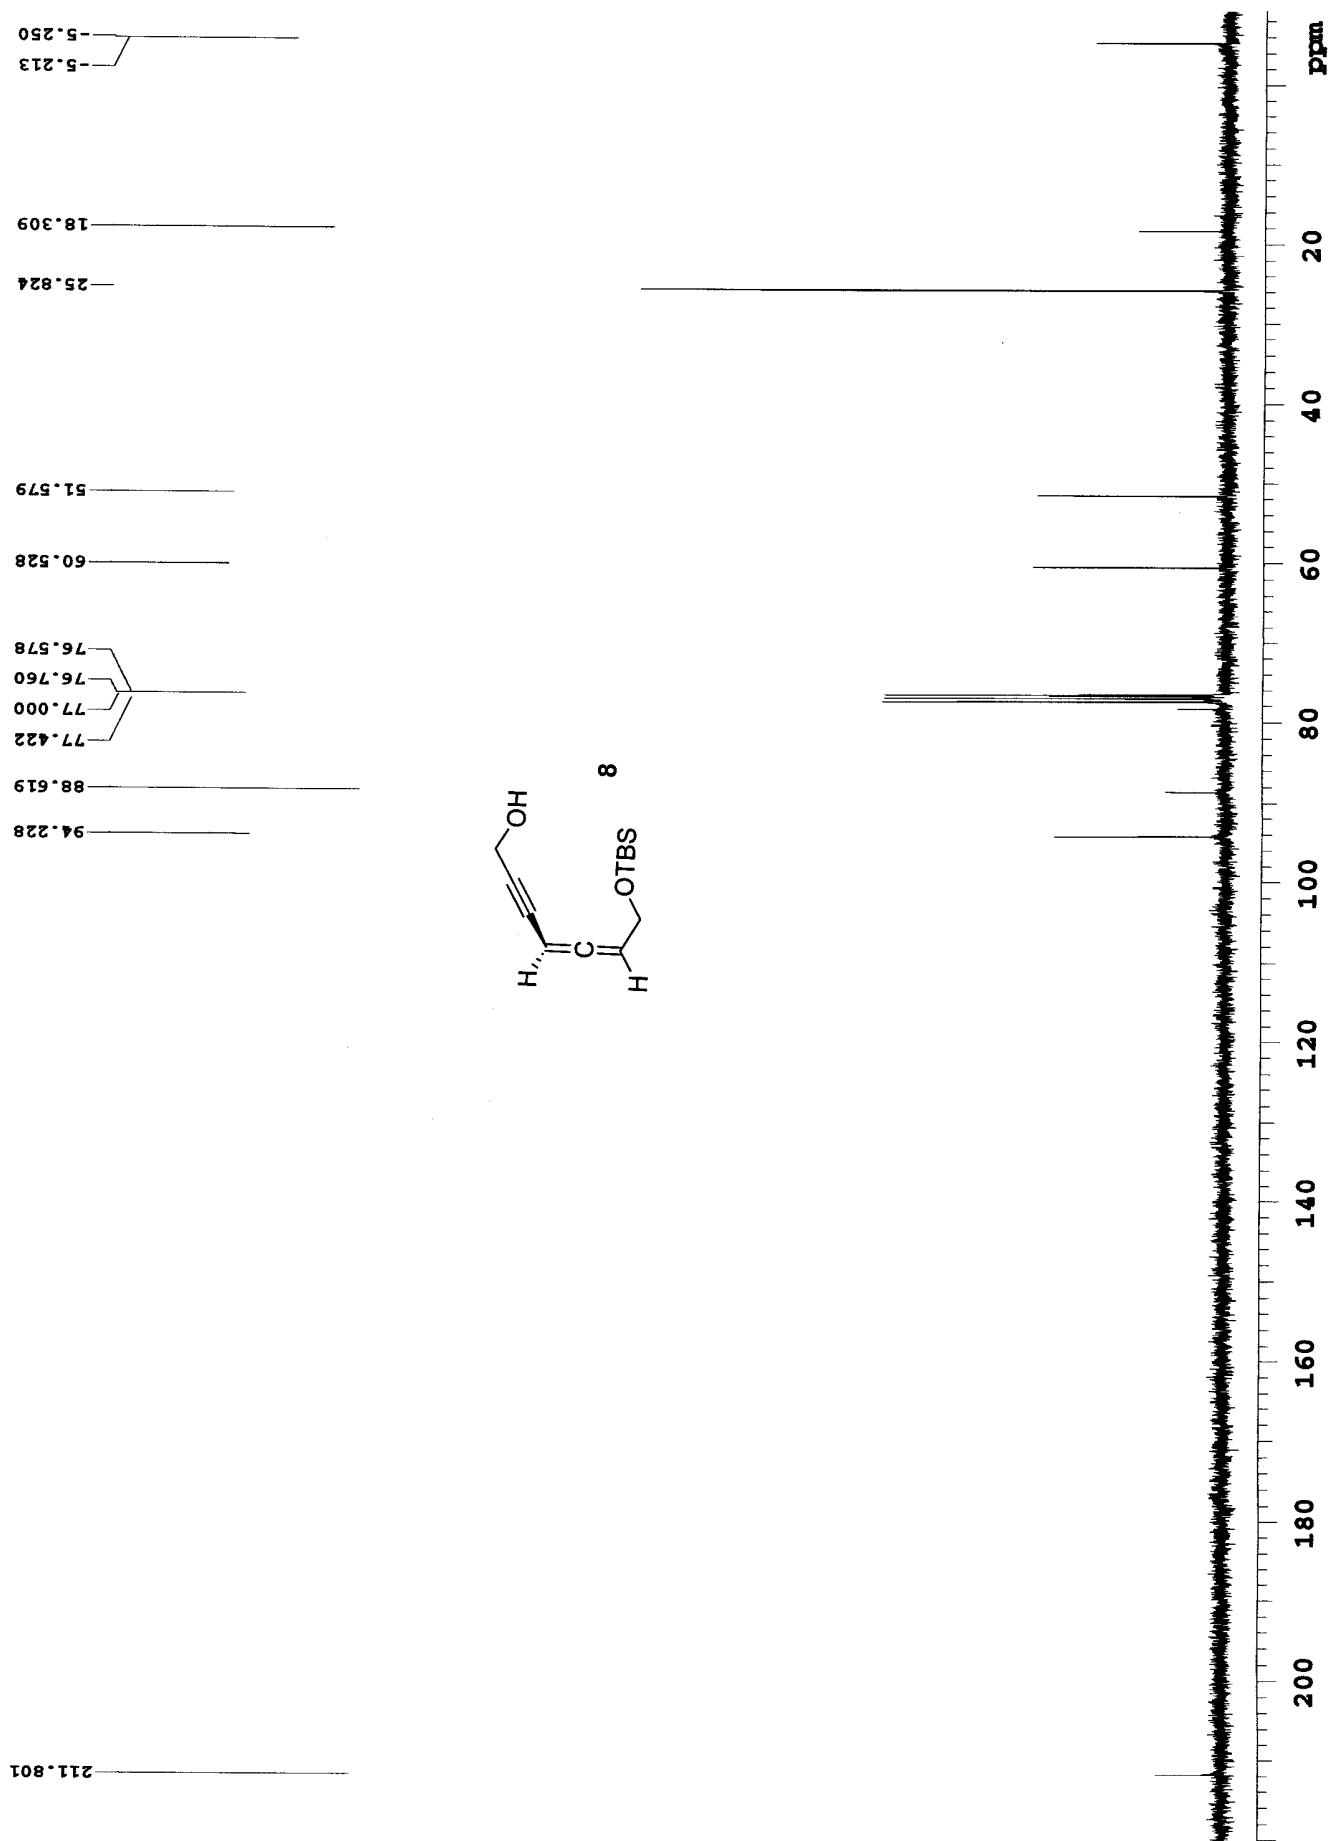

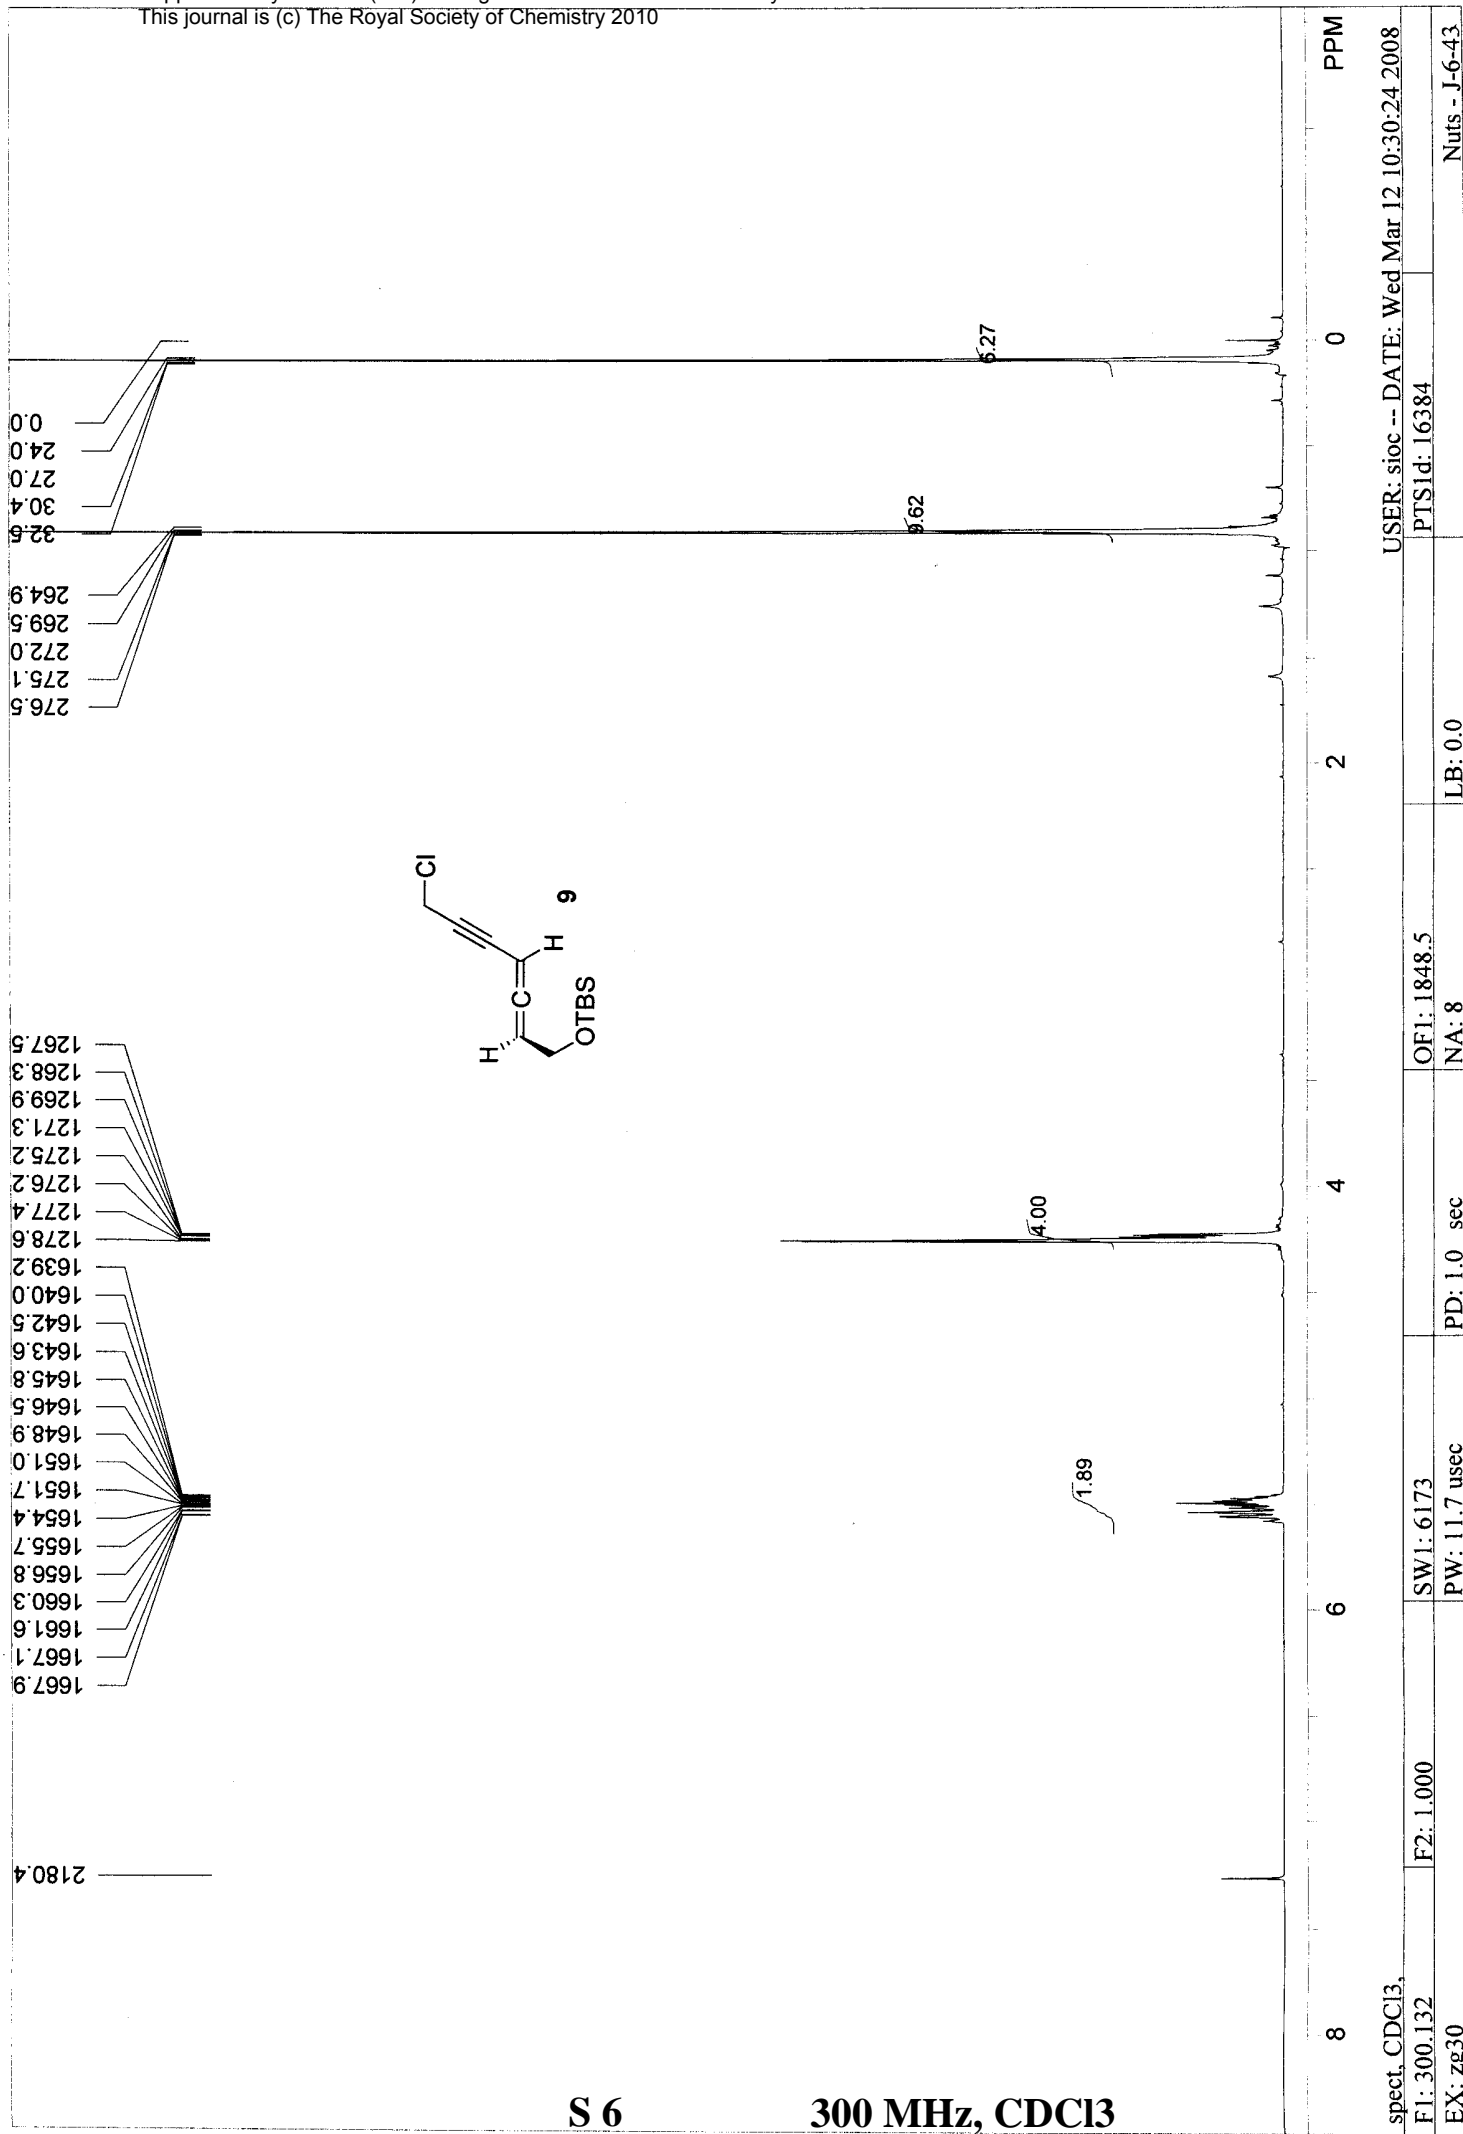

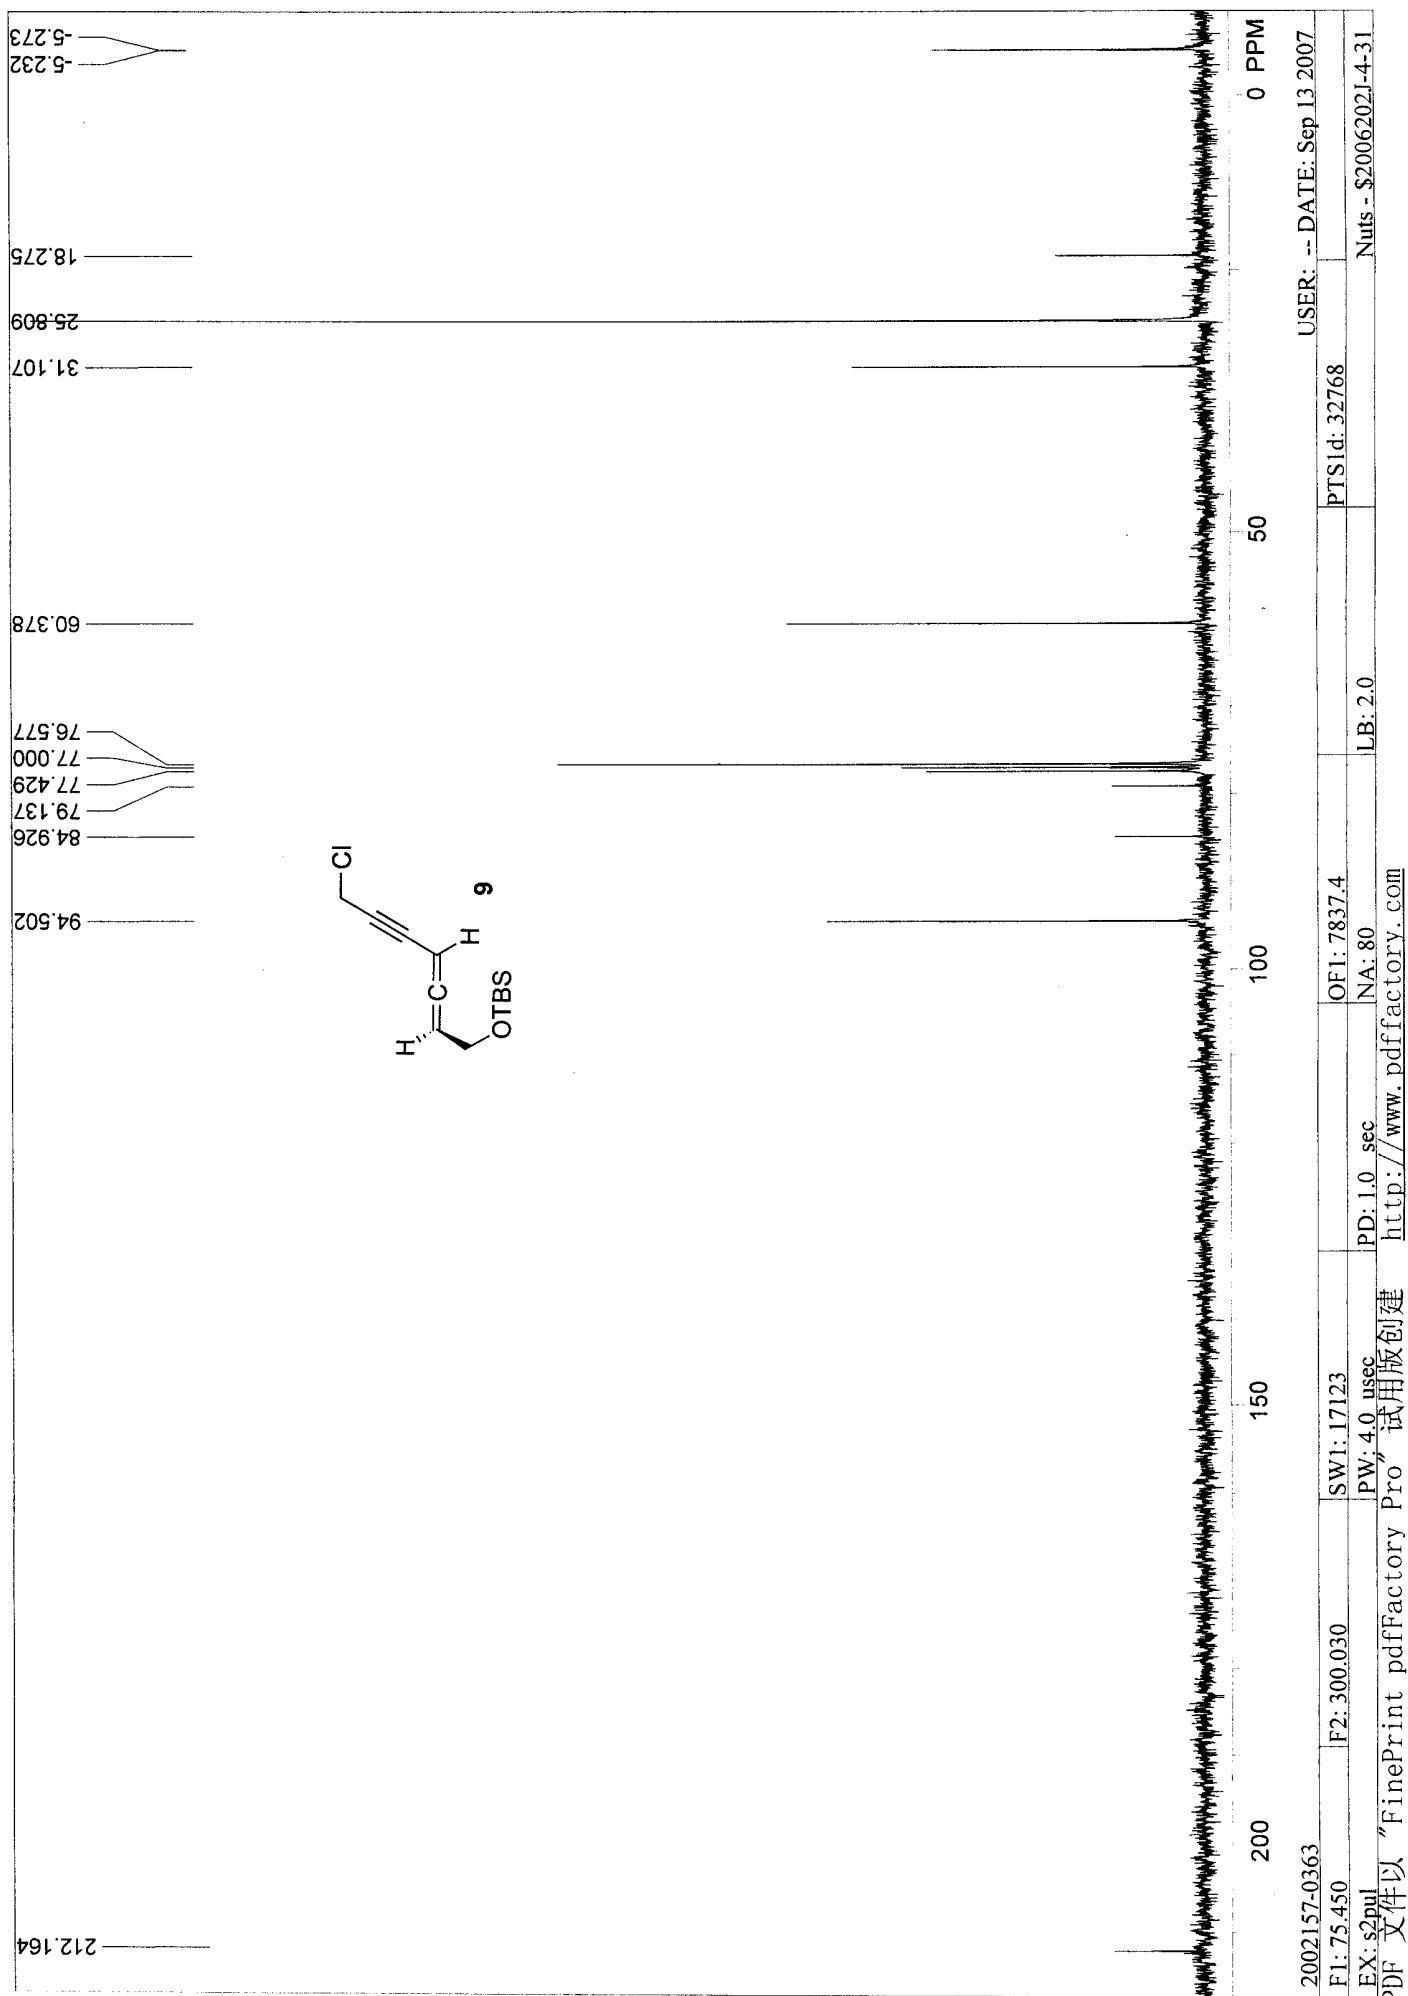

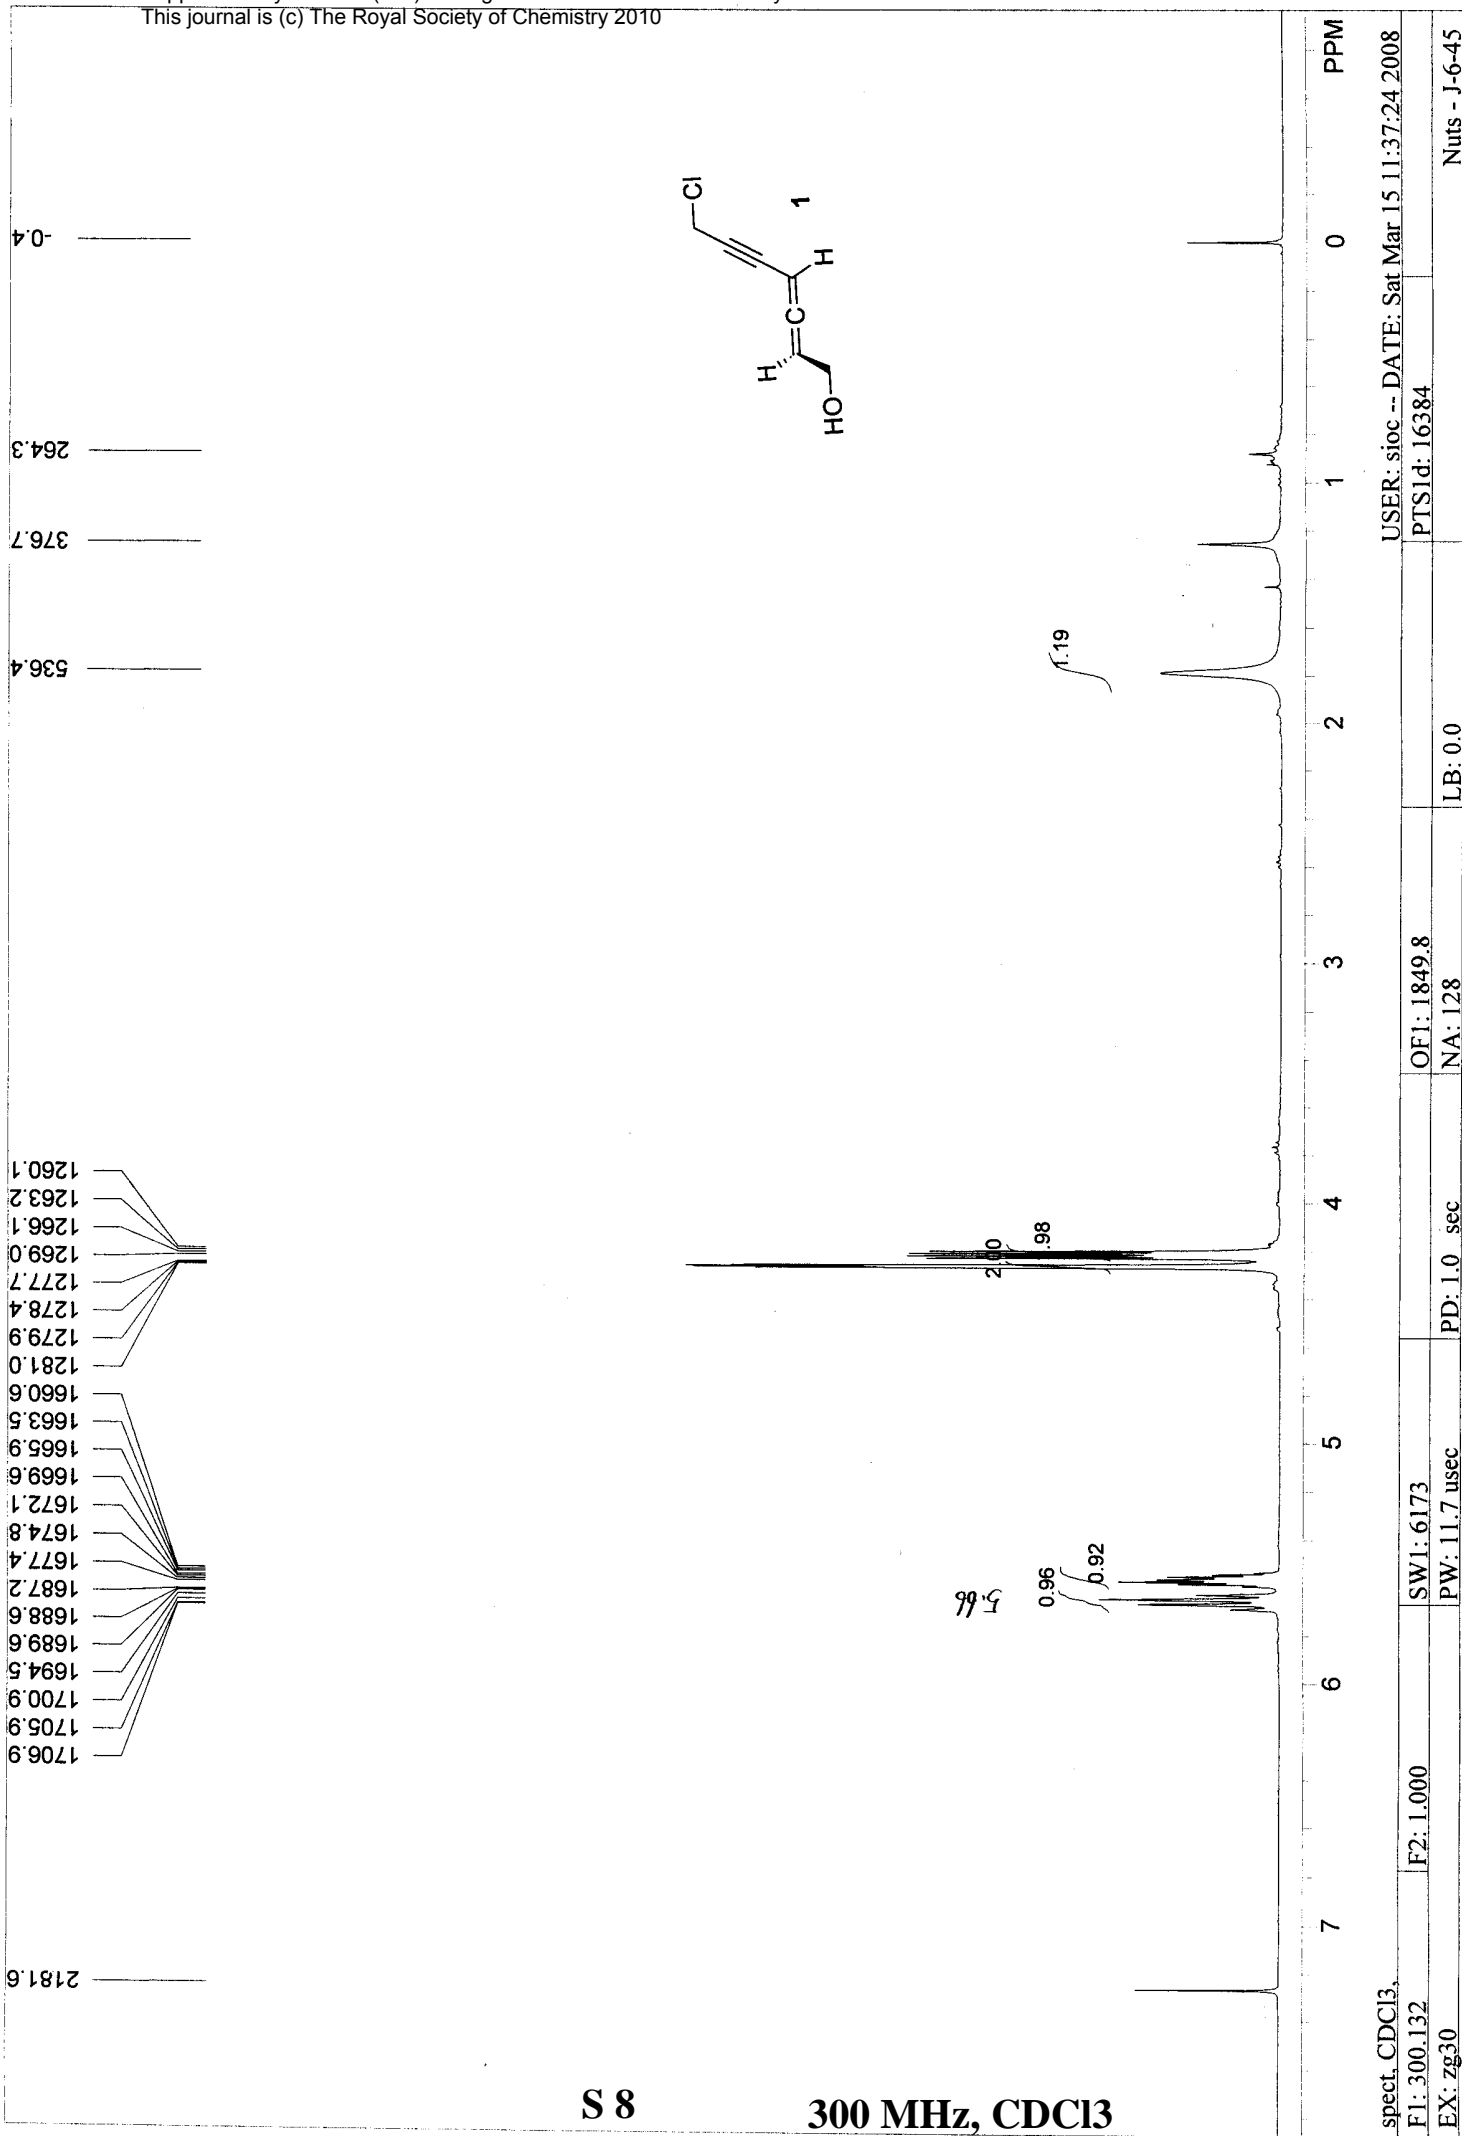

S 8

300 MHz, CDCl<sub>3</sub>

spect. CDCl<sub>3</sub>.

F1: 300.132

F2: 1.000

SW1: 6173

PD: 1.0 sec

OF1: 1849.8

LB: 0.0

PTS1d: 16384

USER: sjoc -- DATE: Sat Mar 15 11:37:24 2008

EX: zg30

Nuts - J-6-45



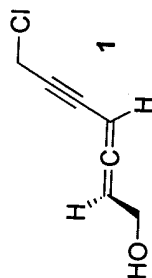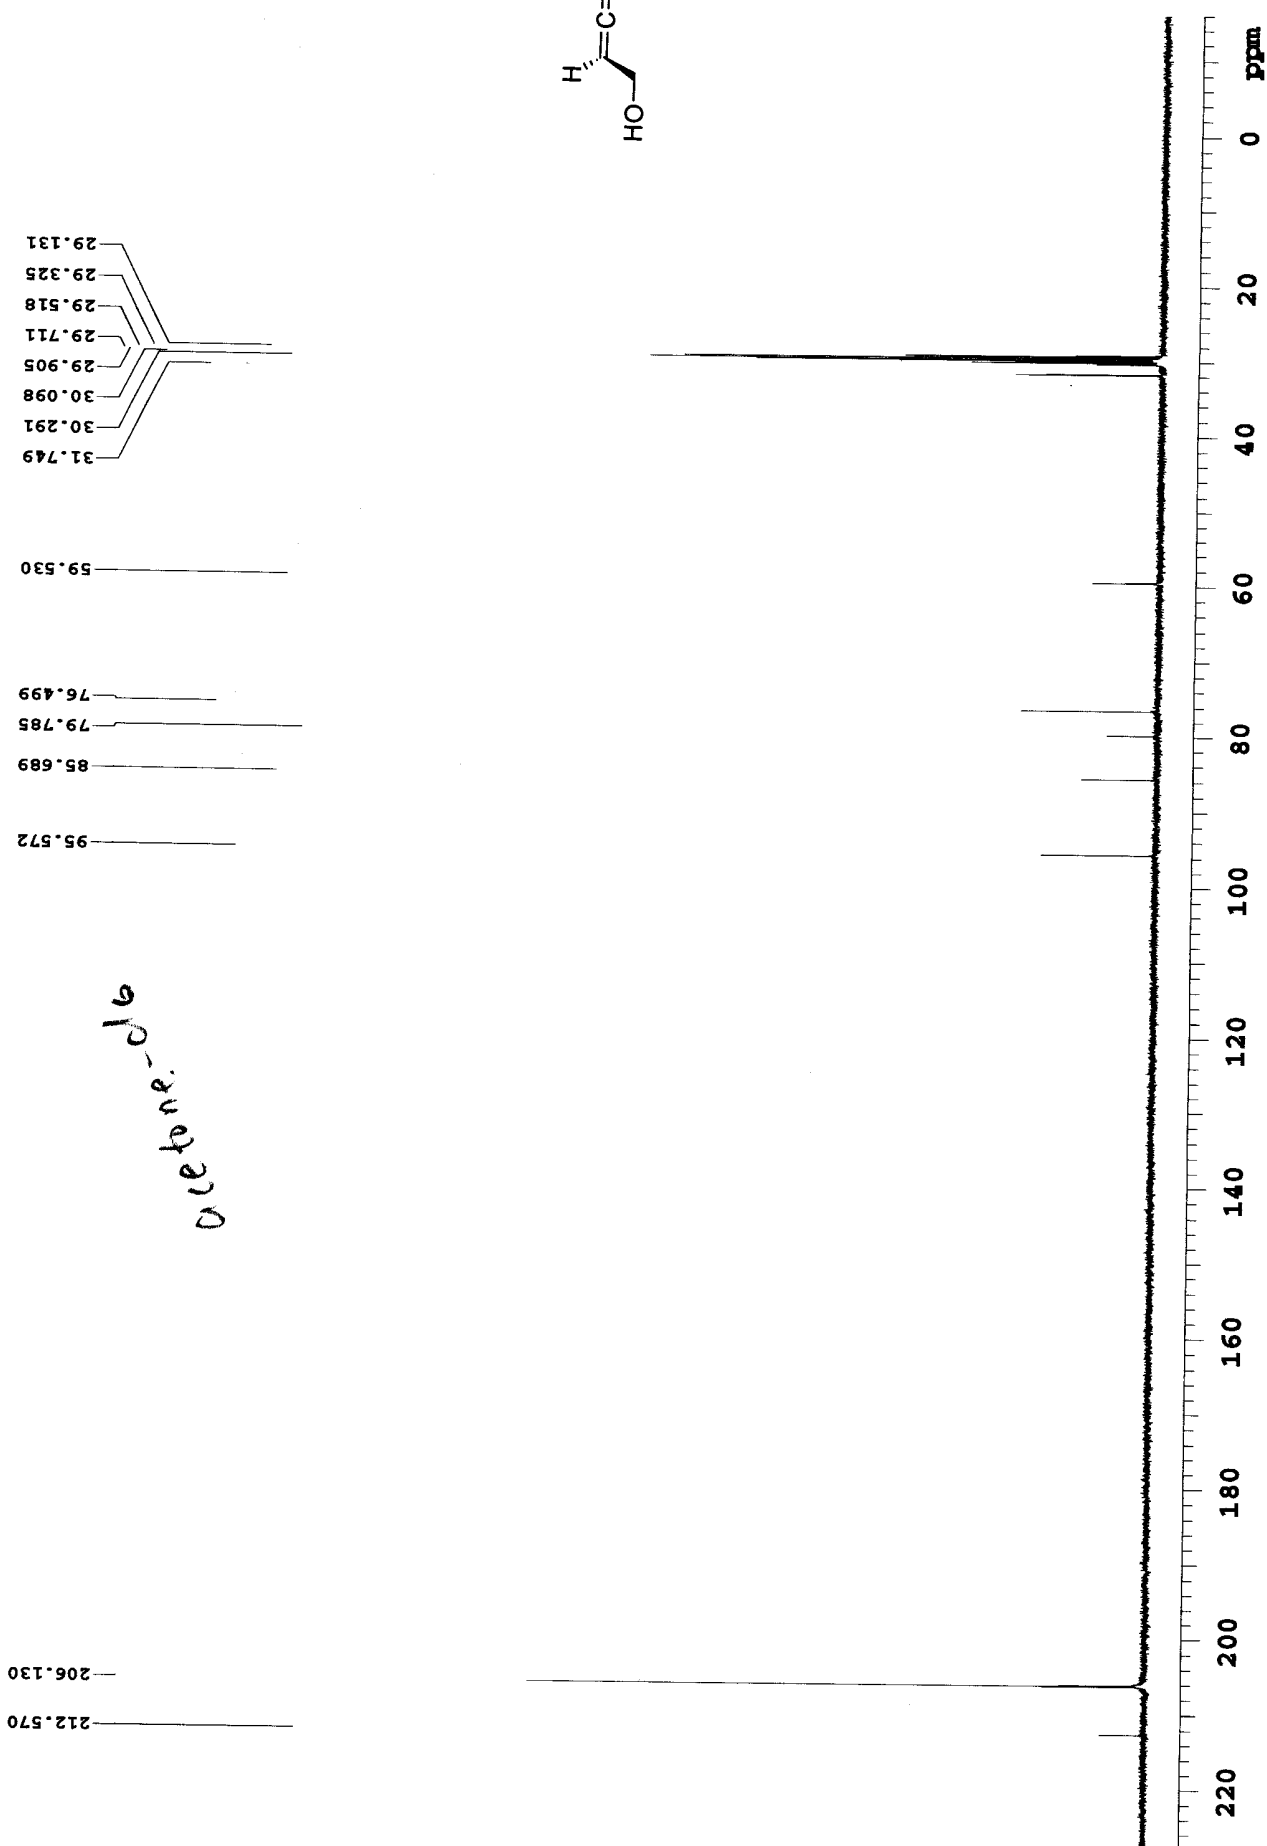

acetone-d6

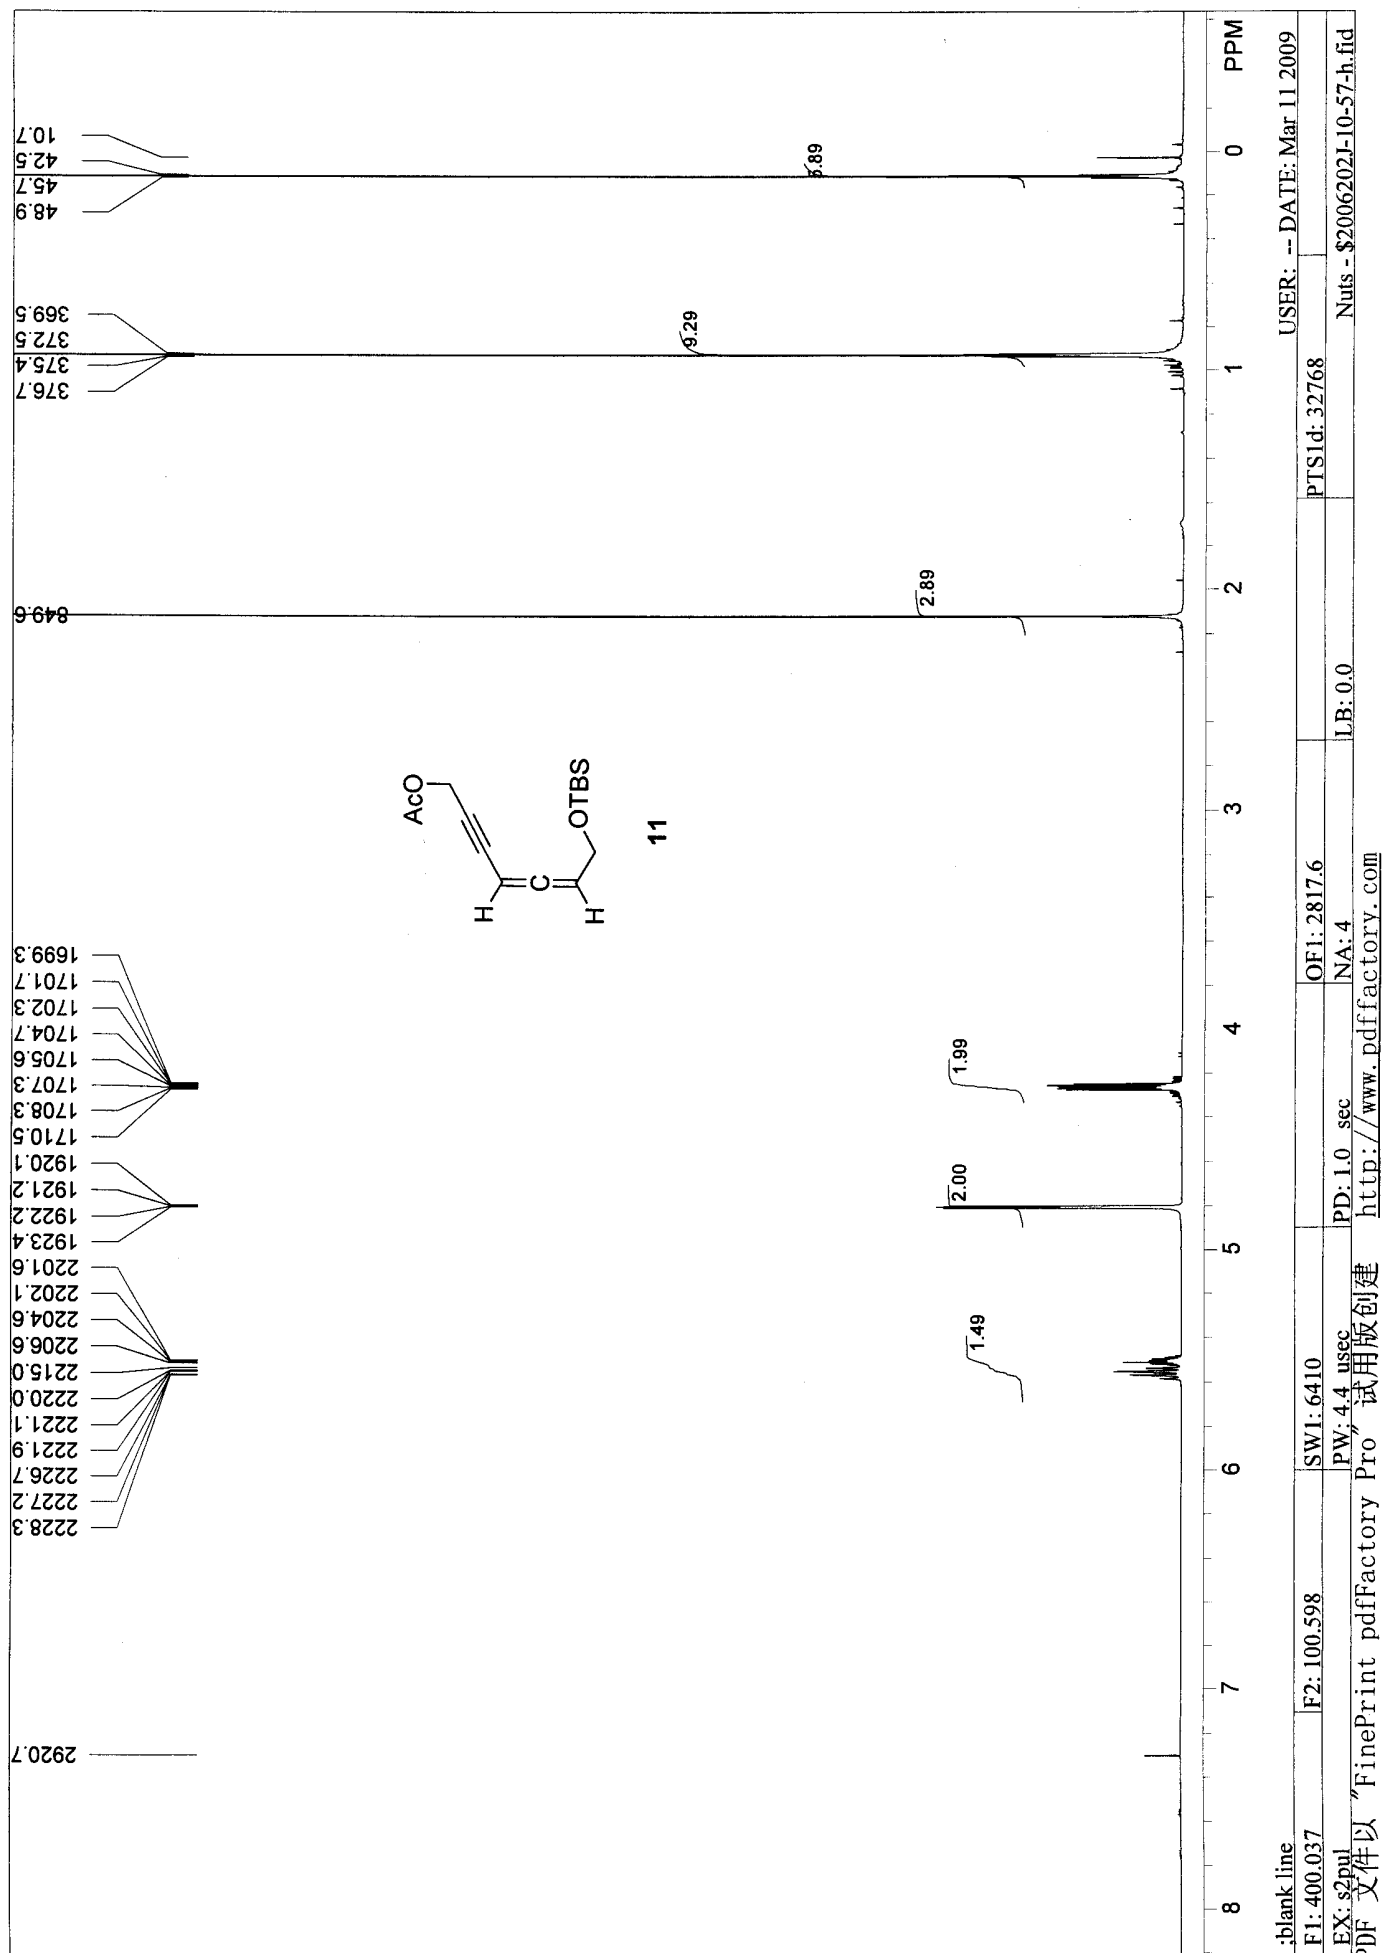

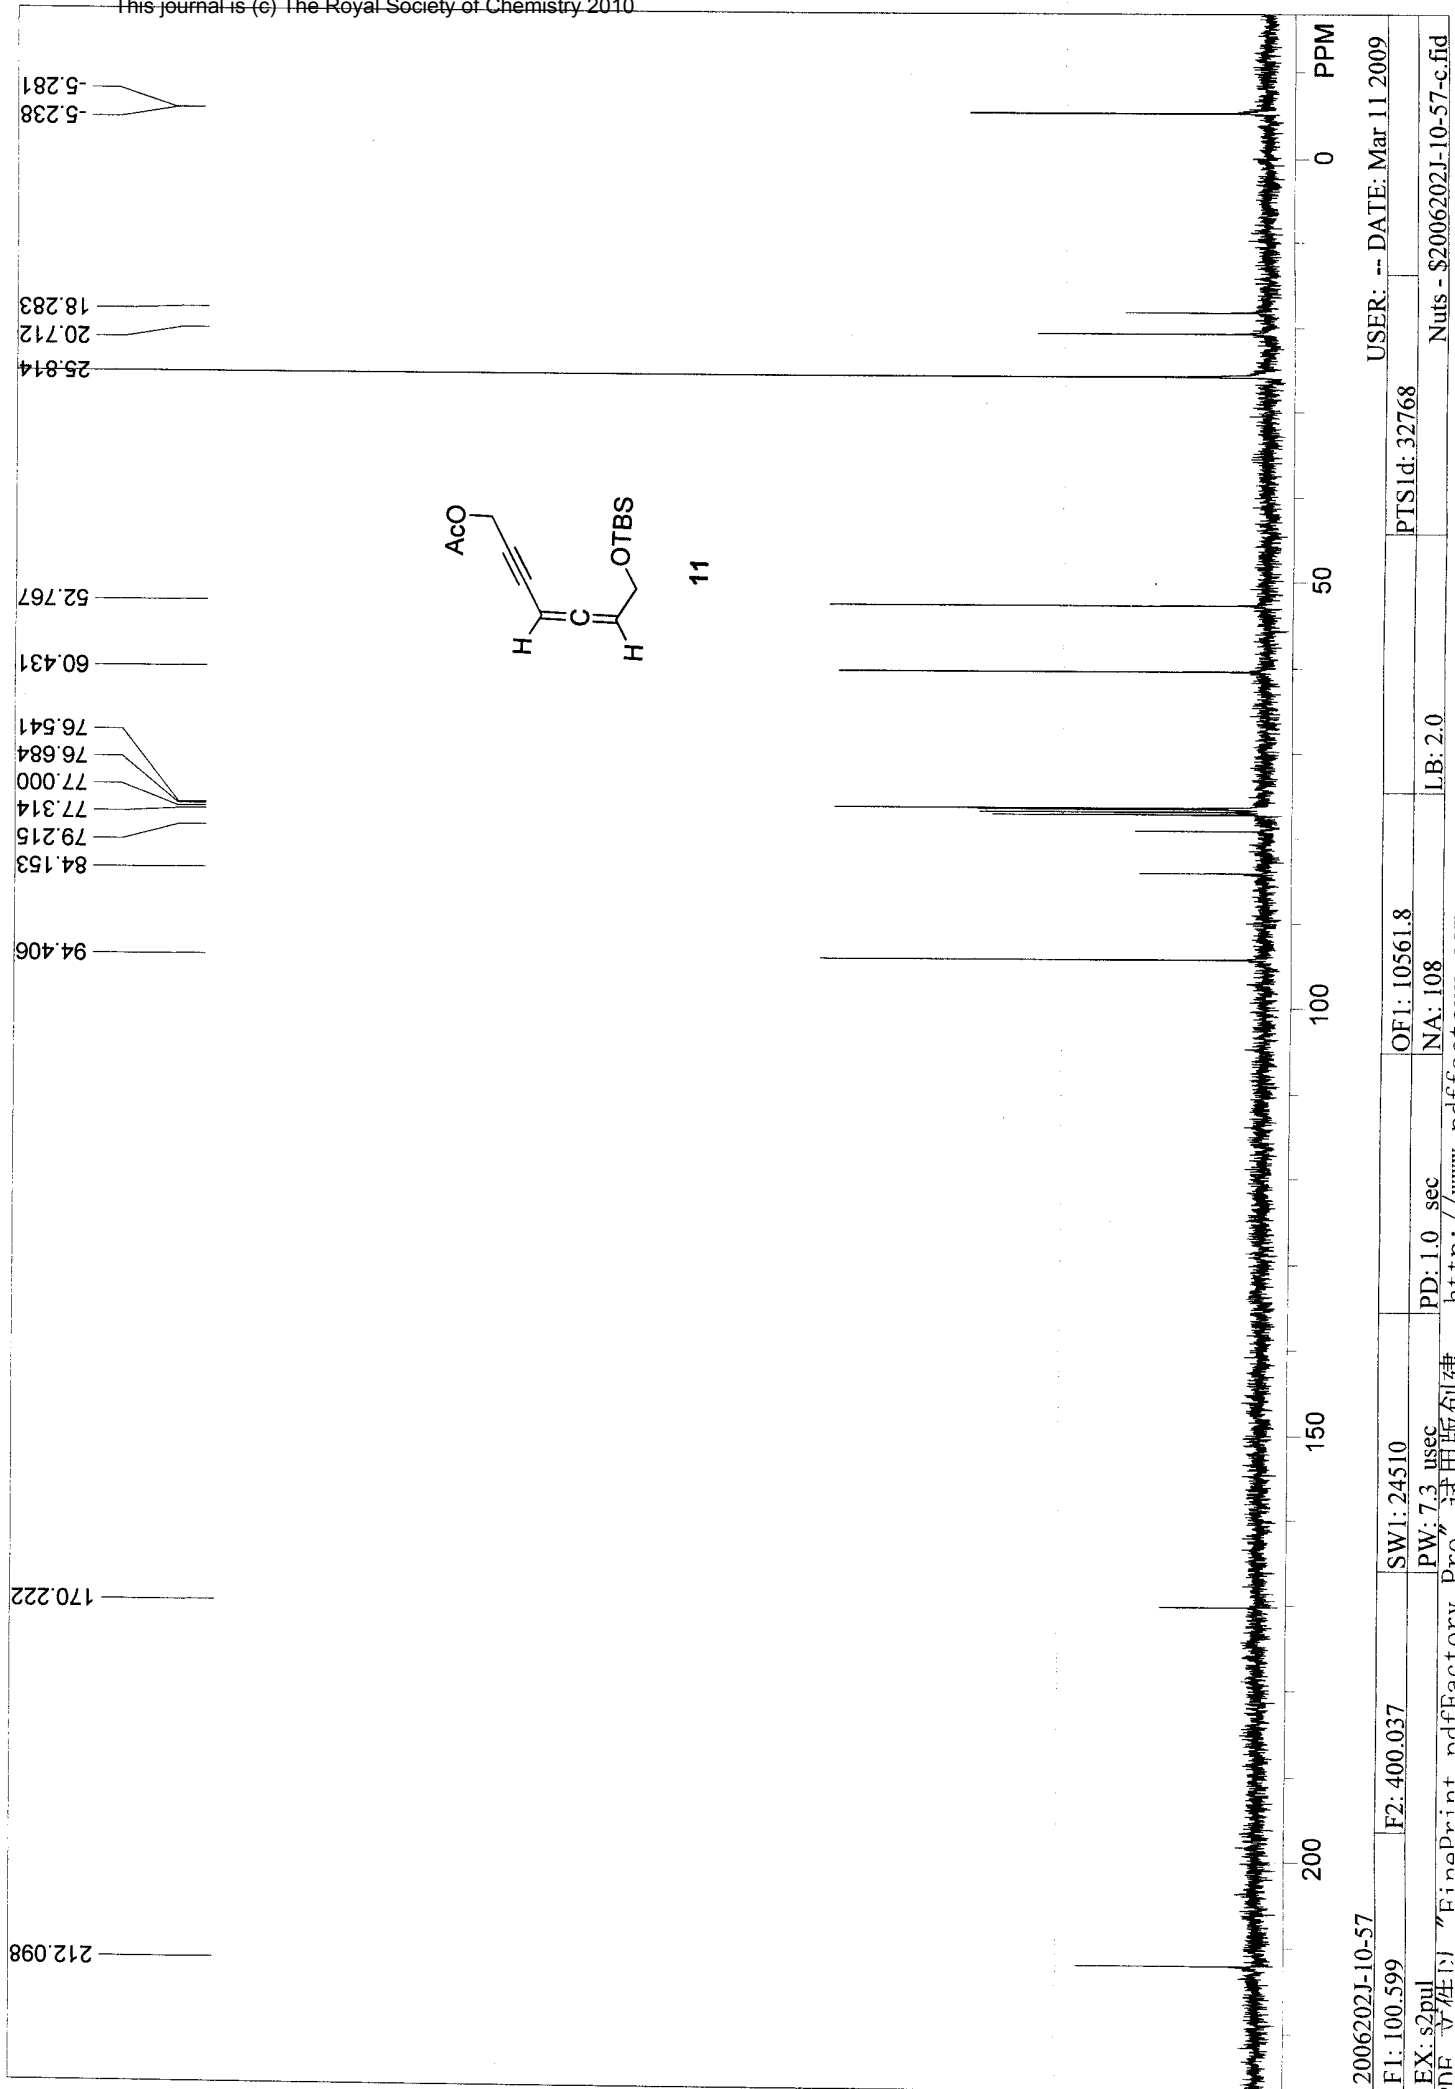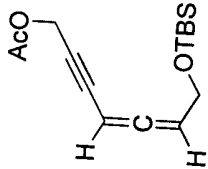

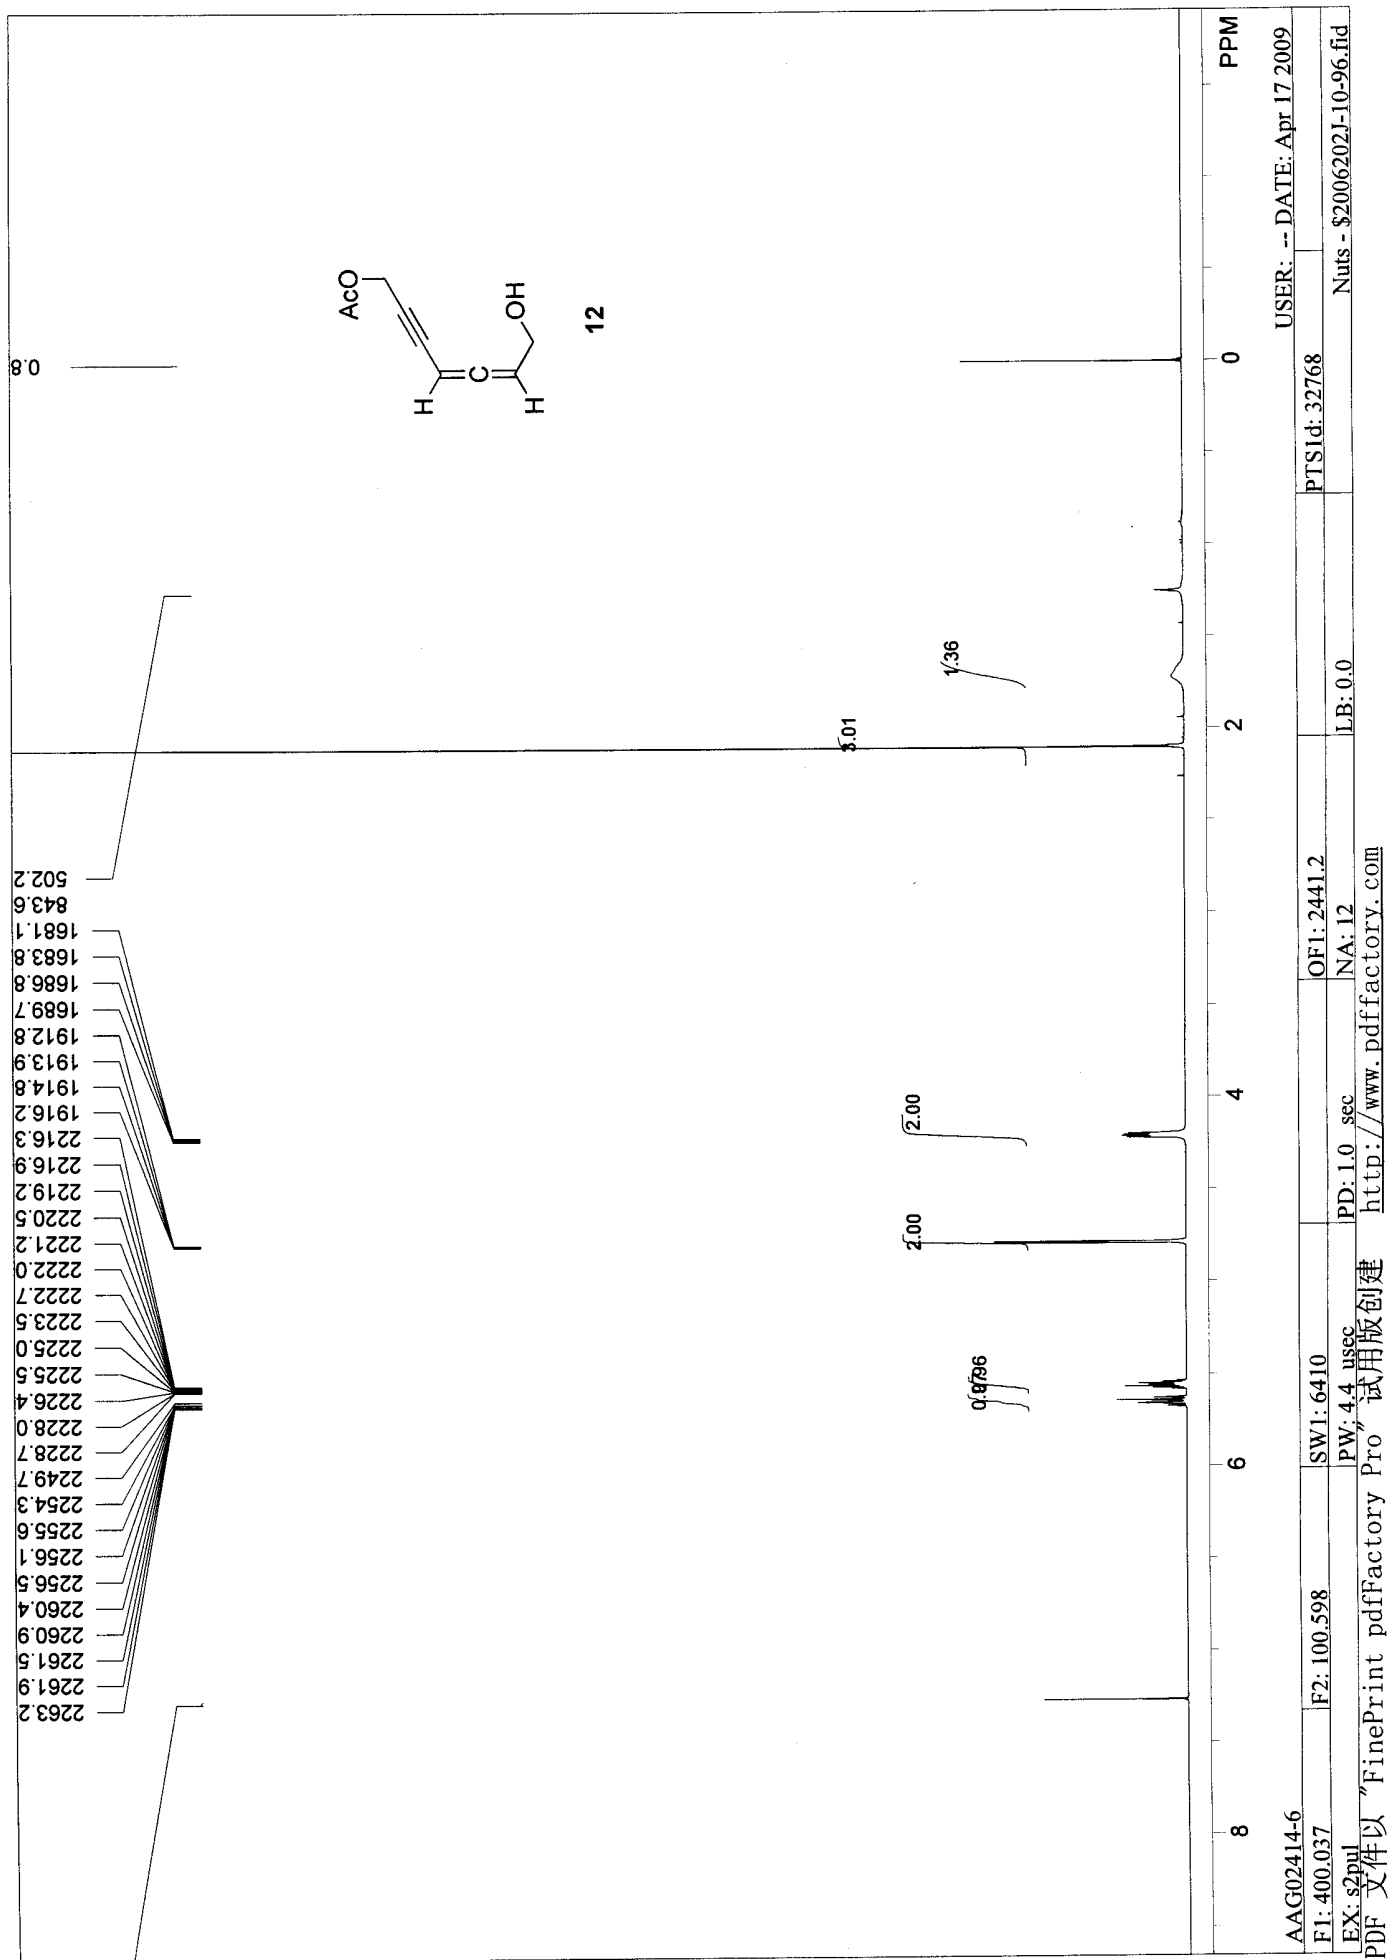

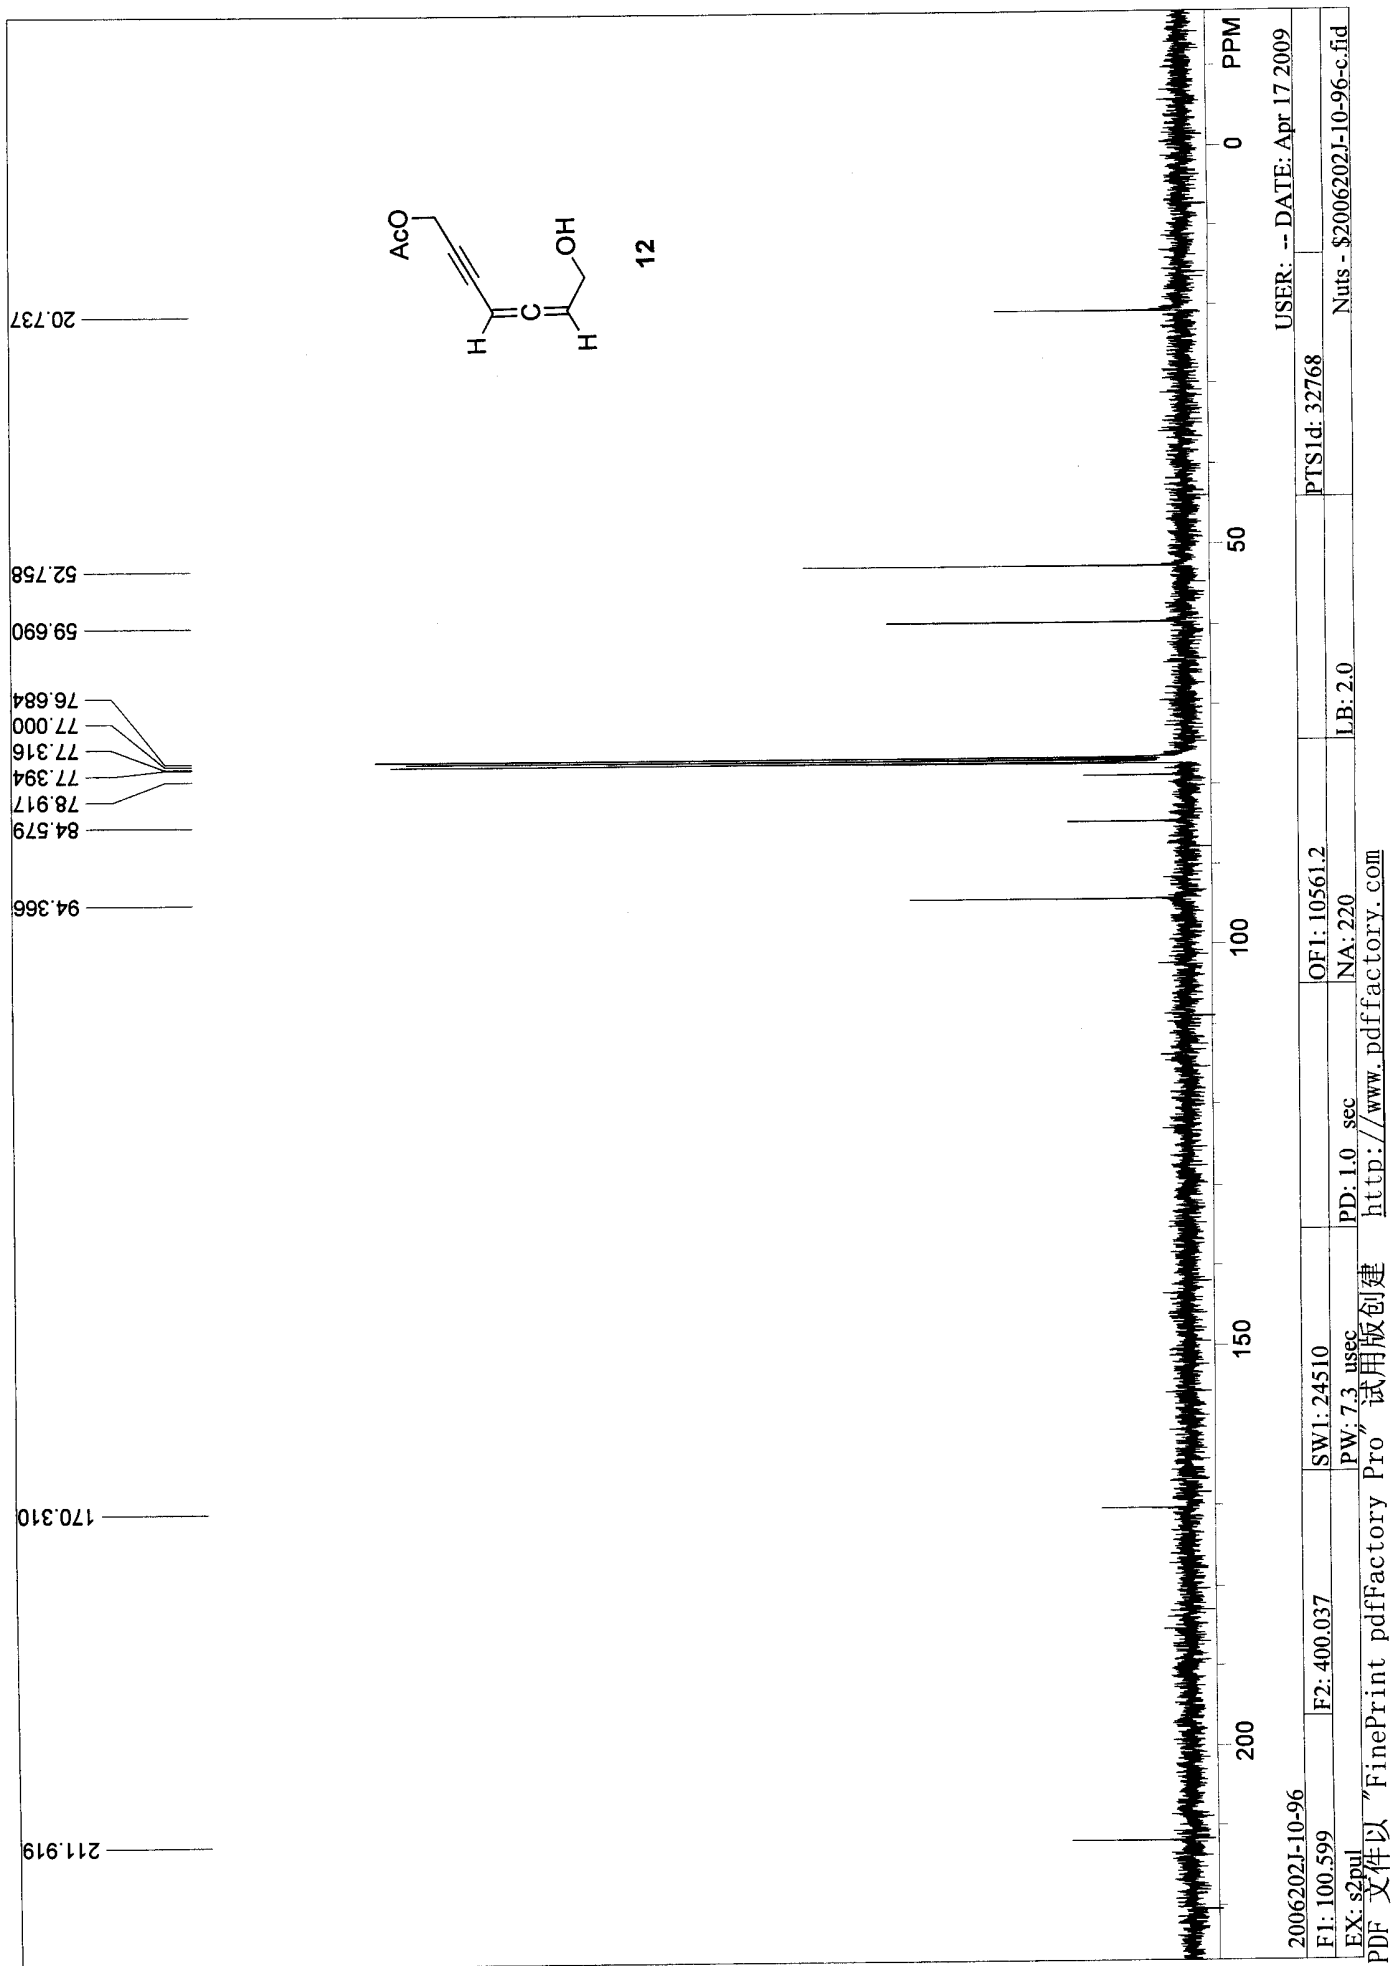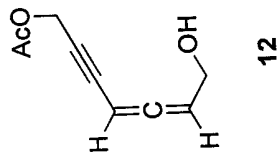

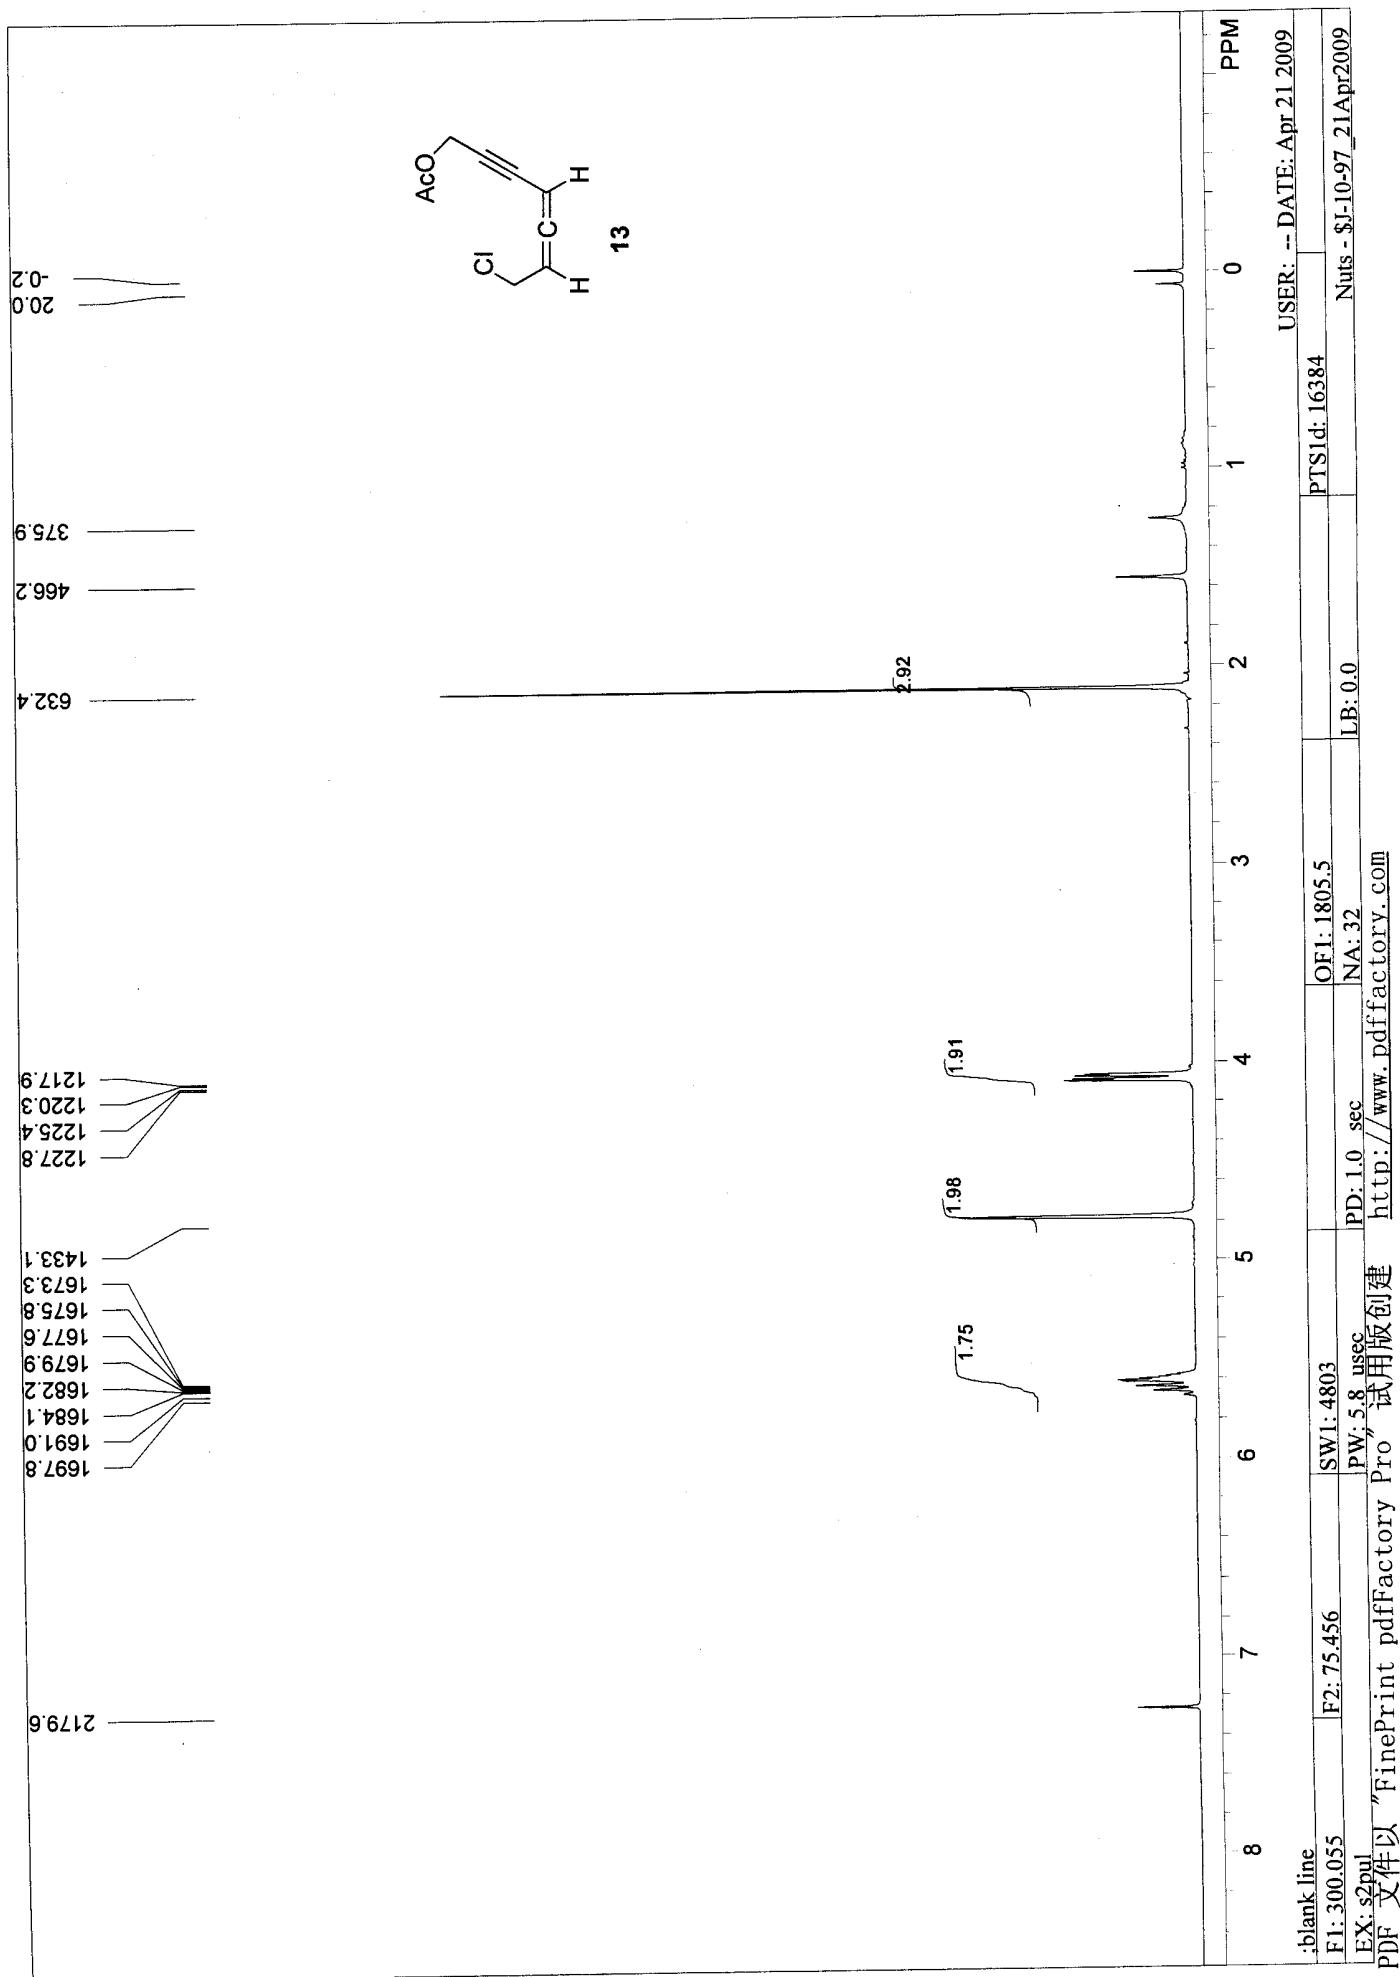

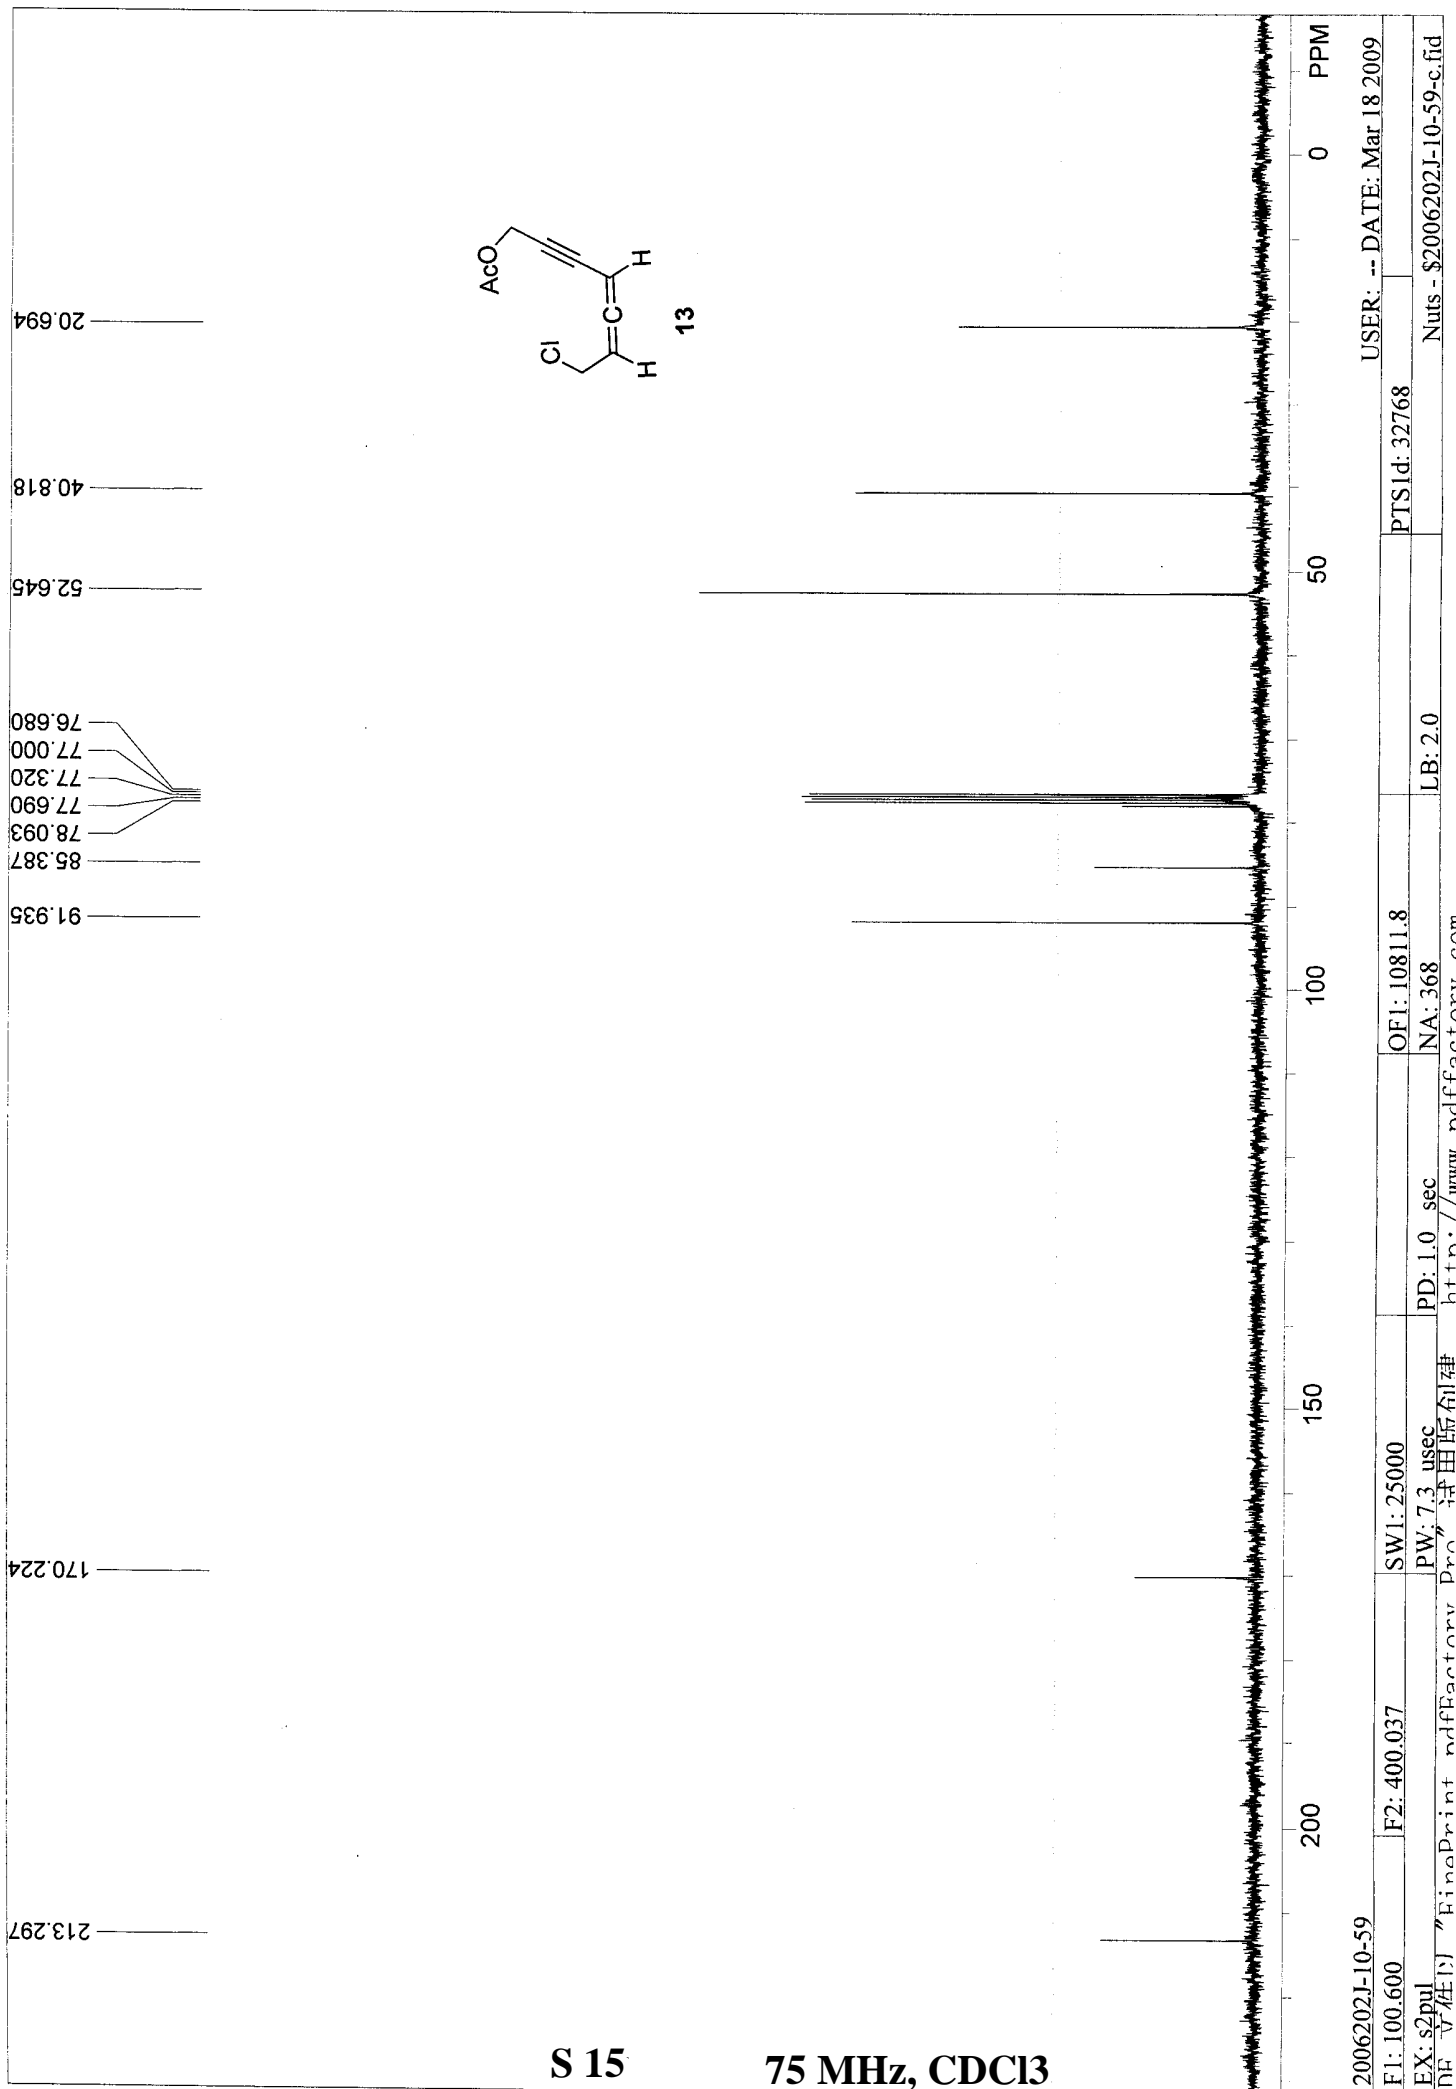

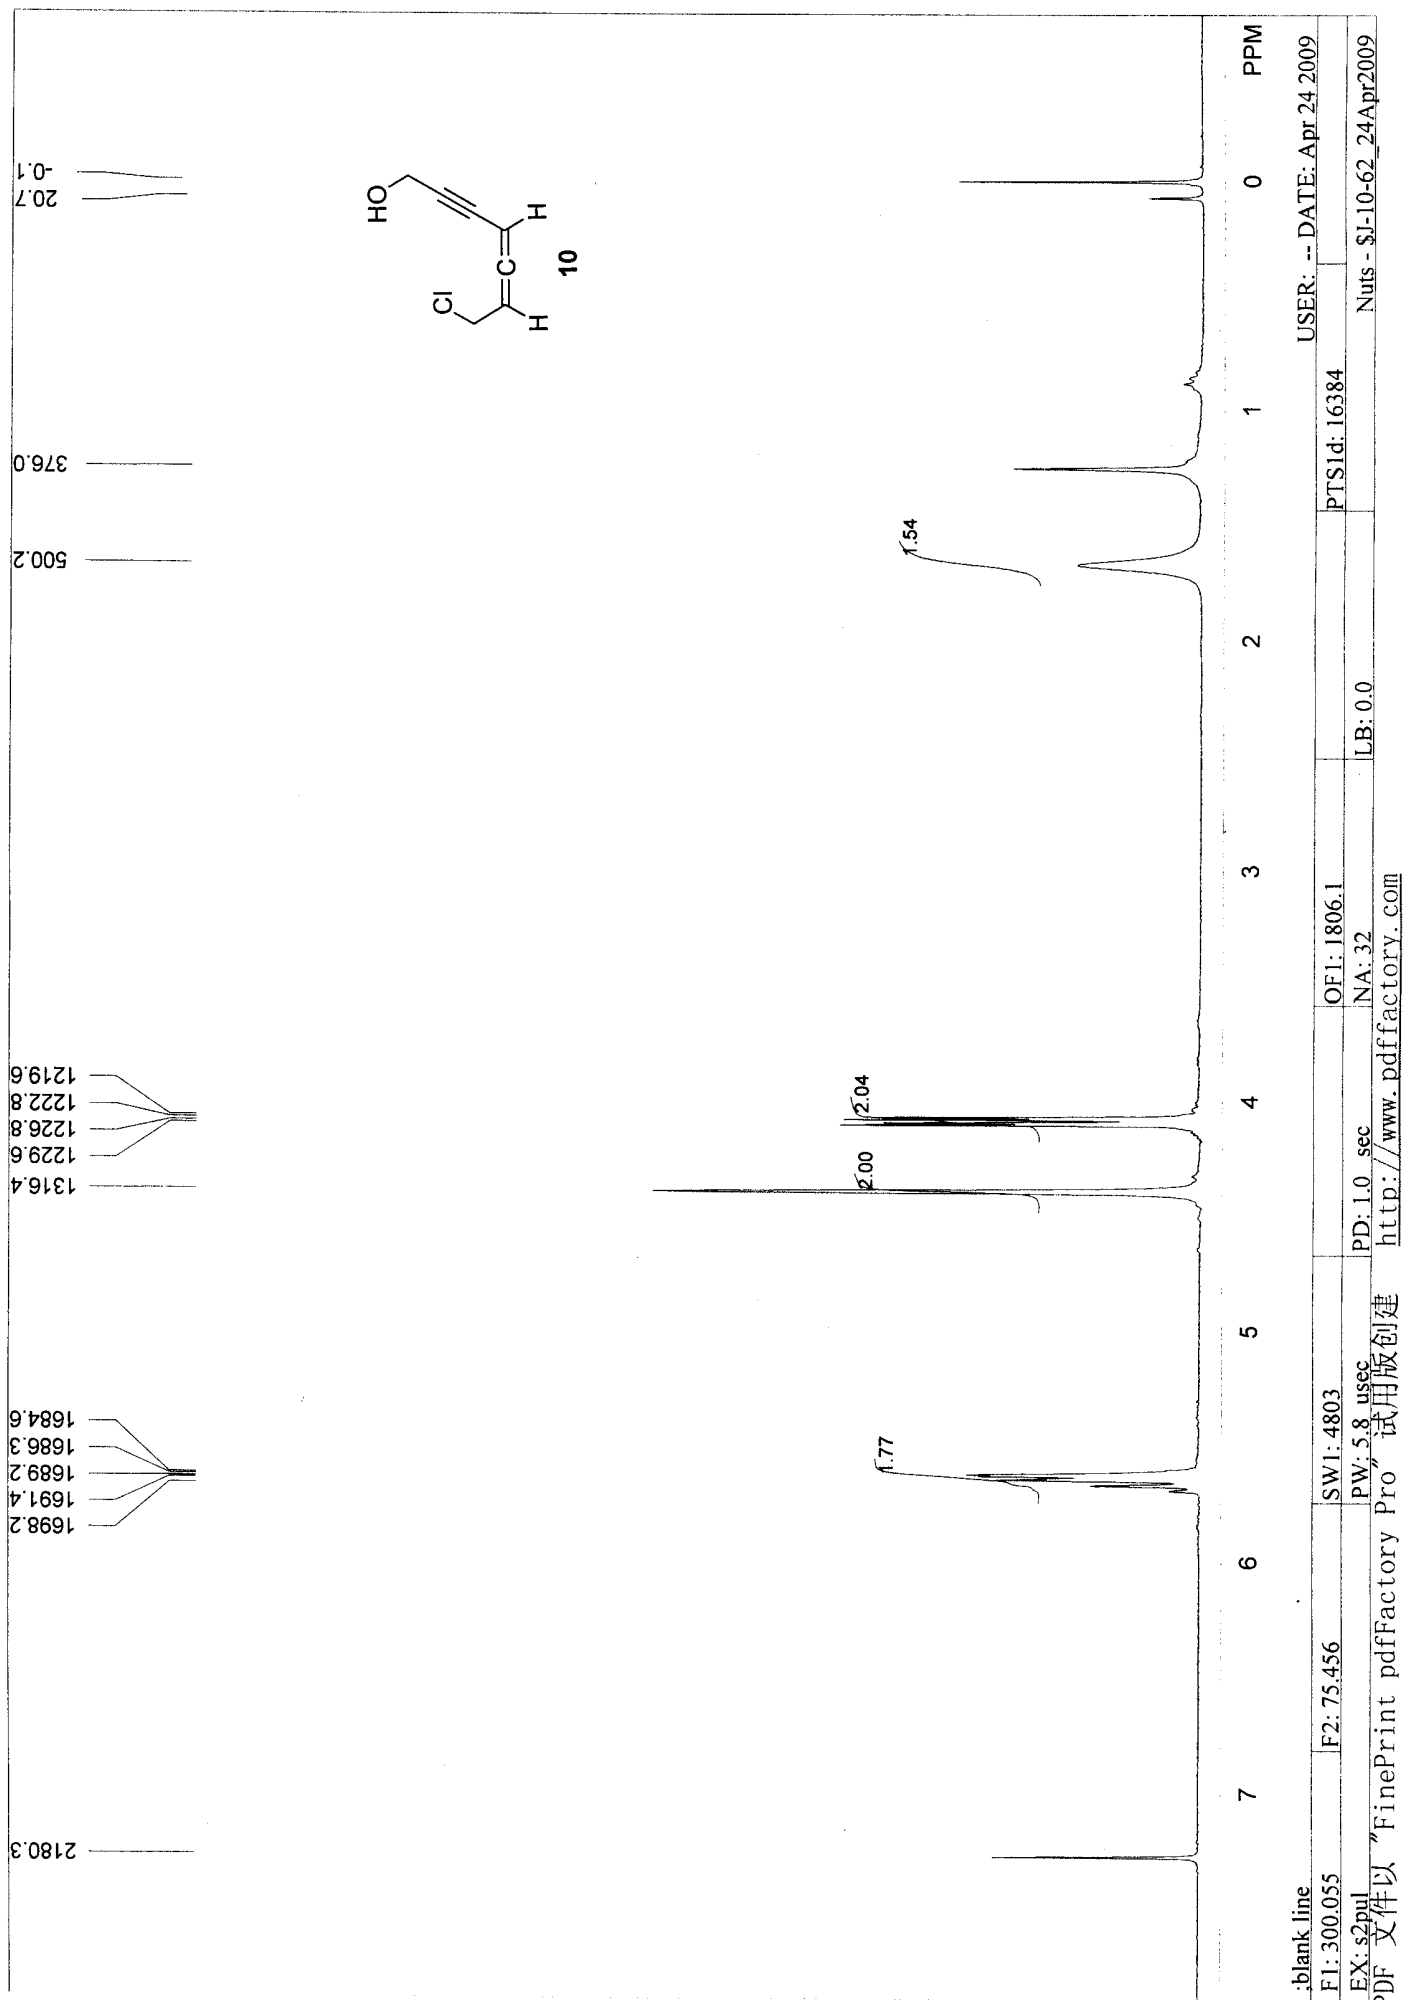



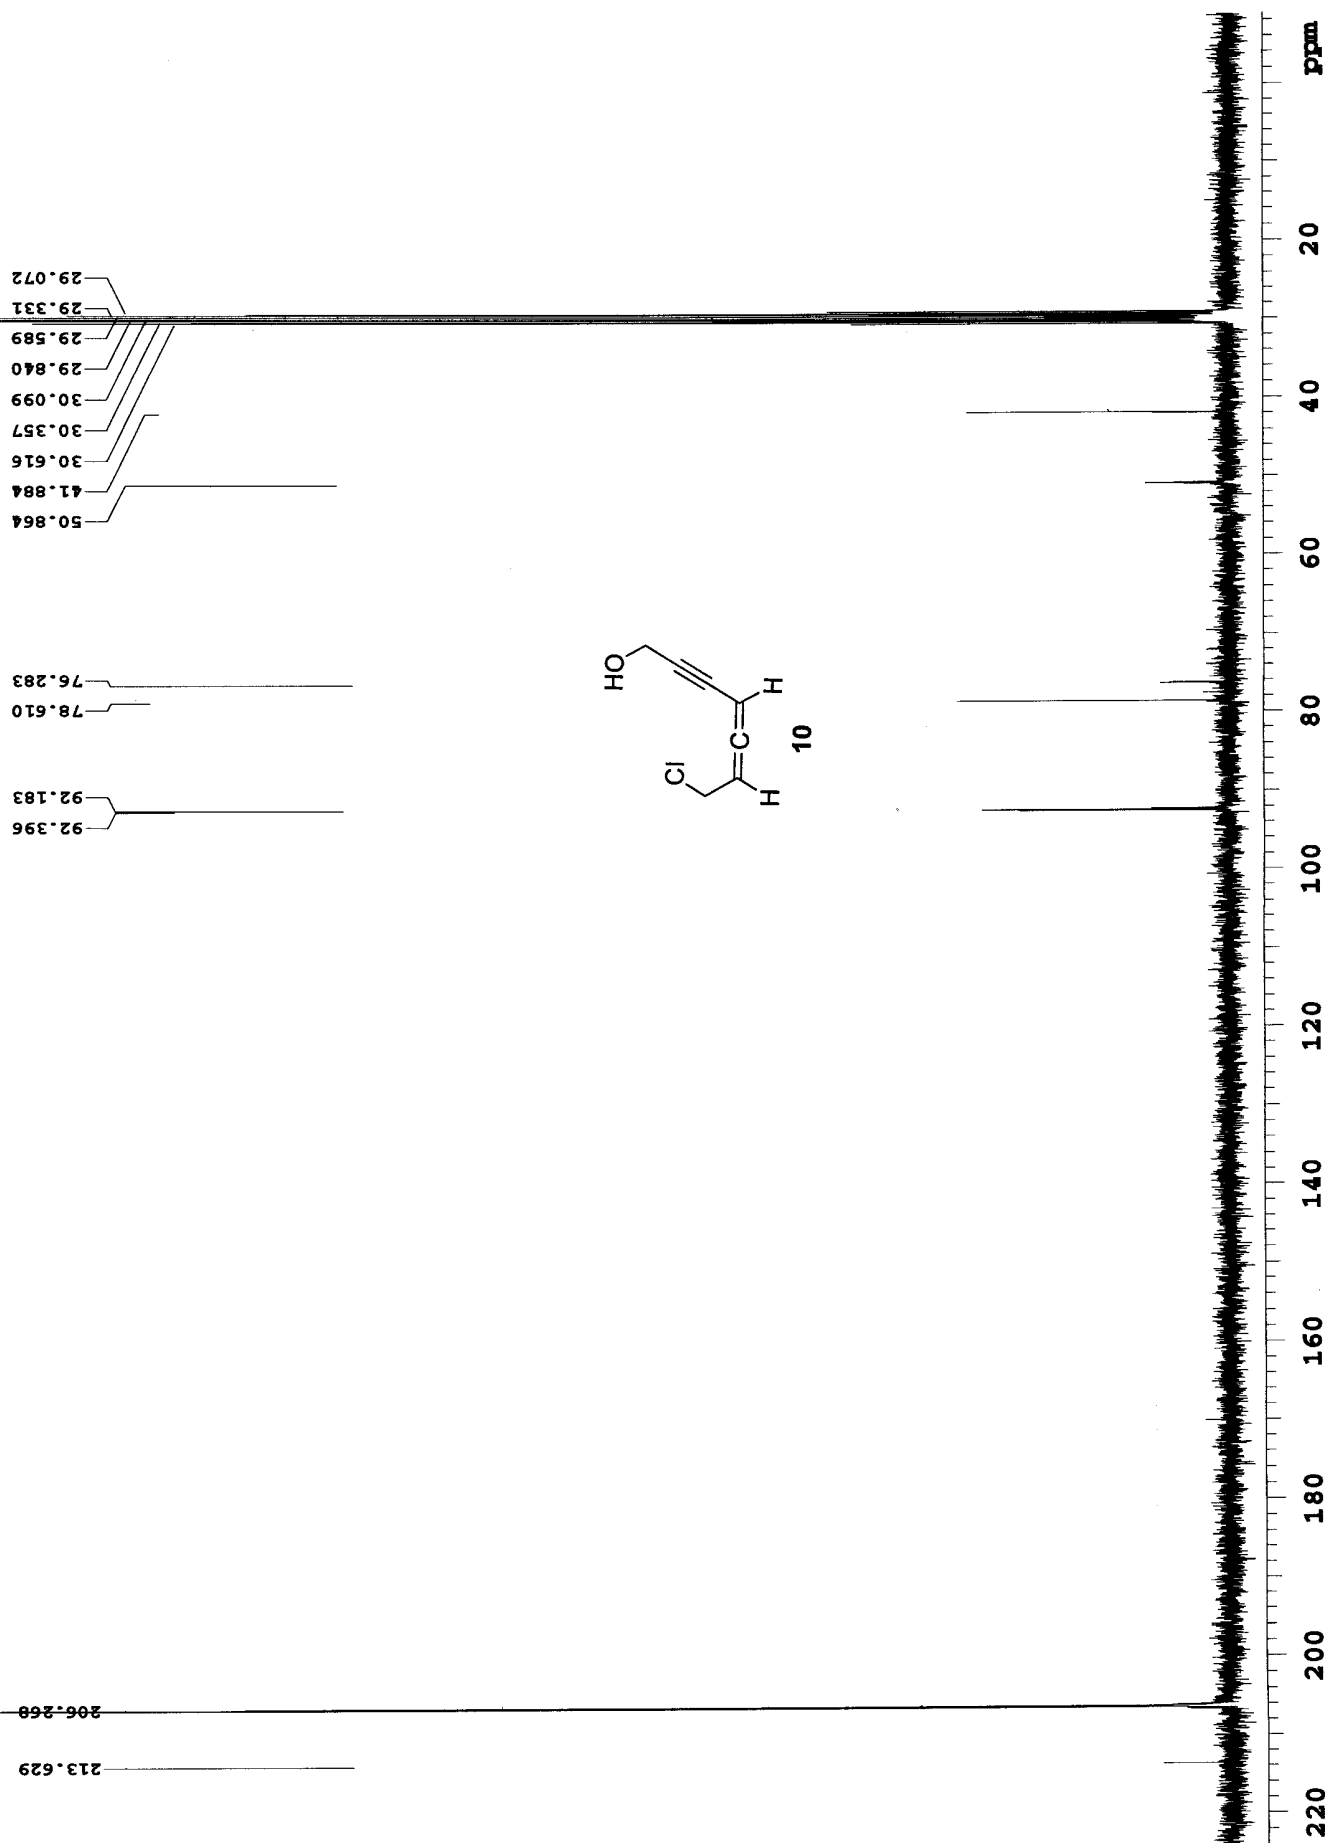

20062025-10-62

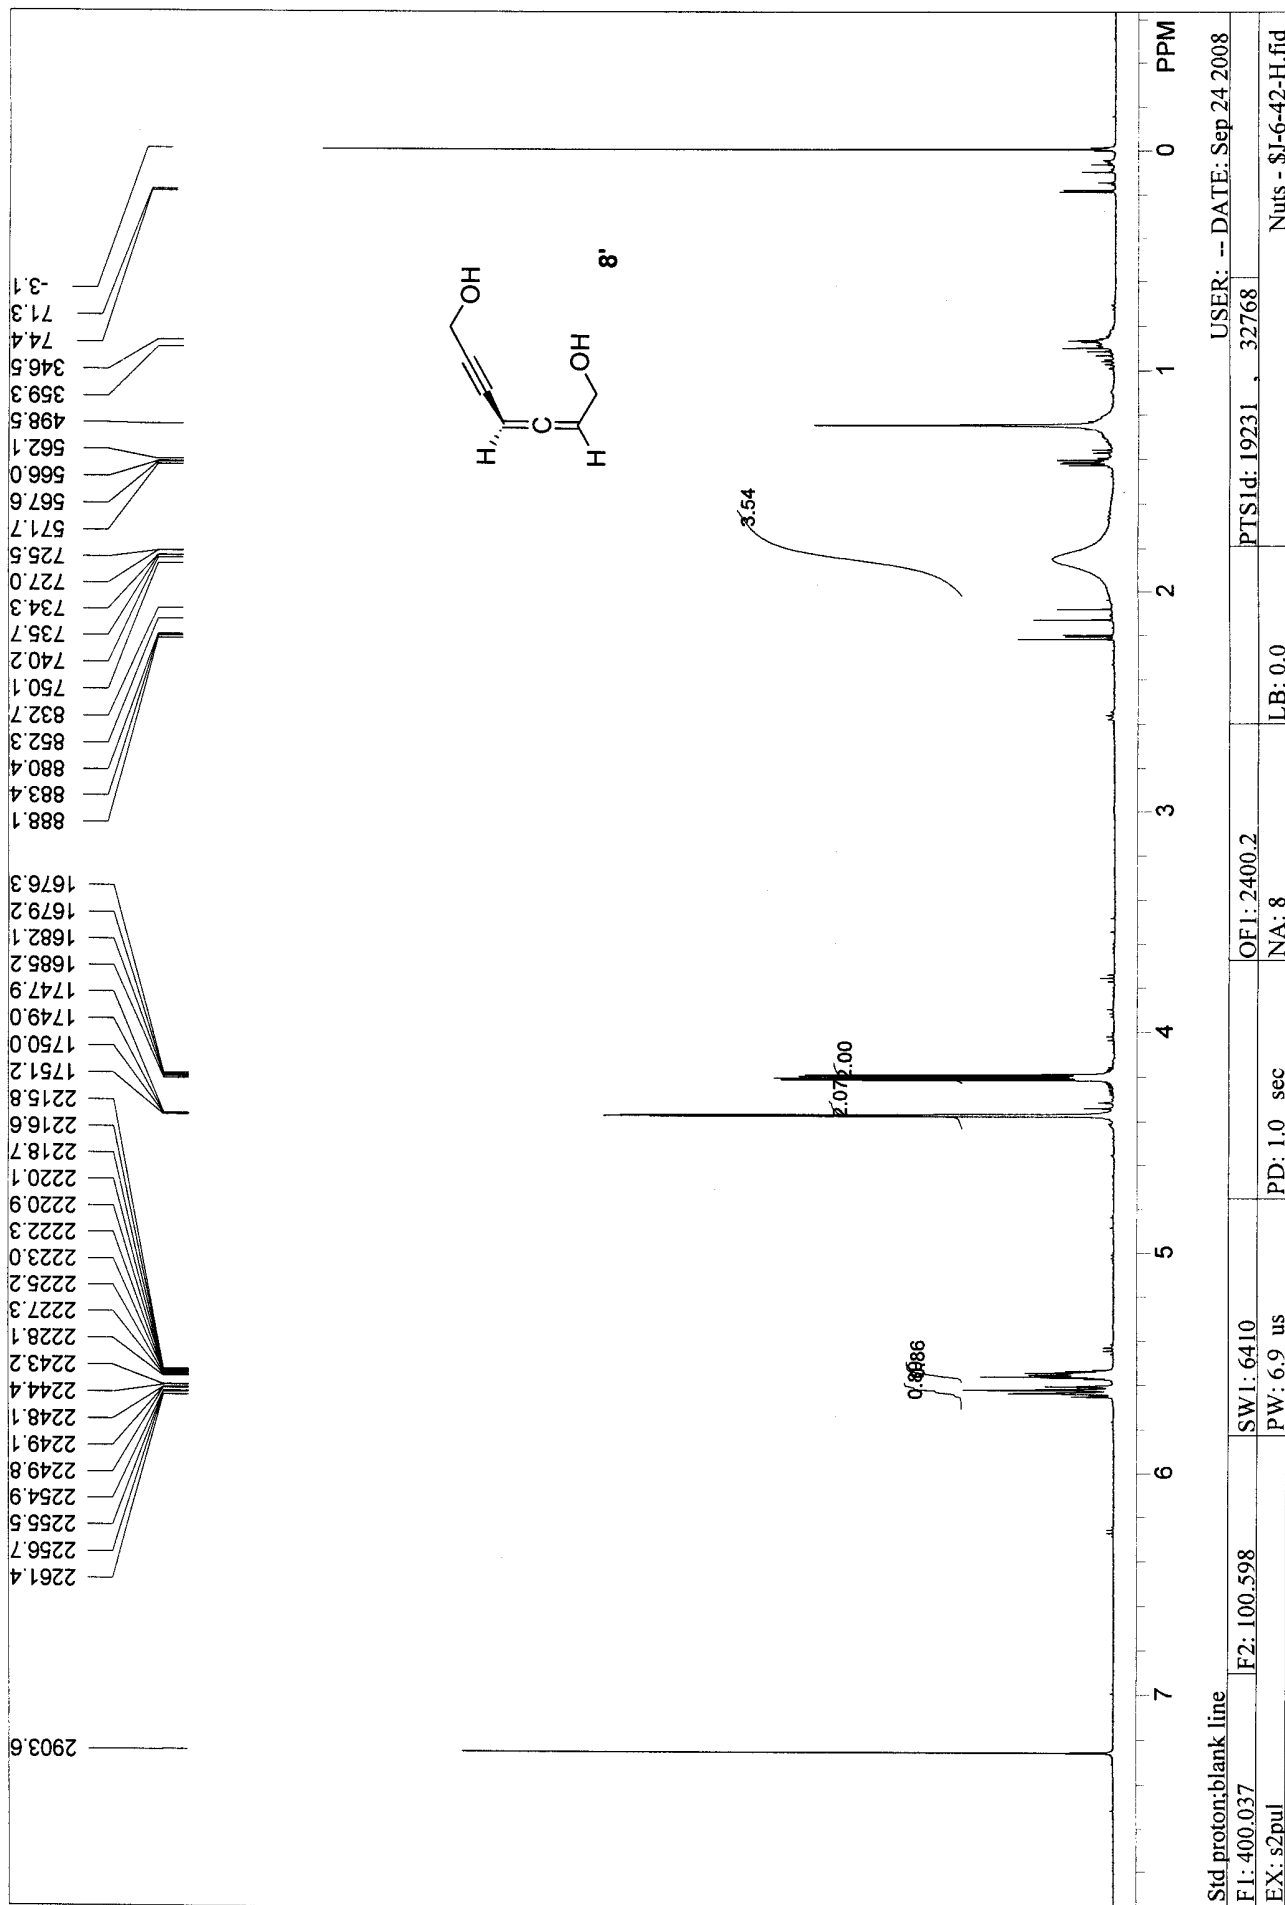

J-6-42

File: xp

Pulse Sequence: s2pu1

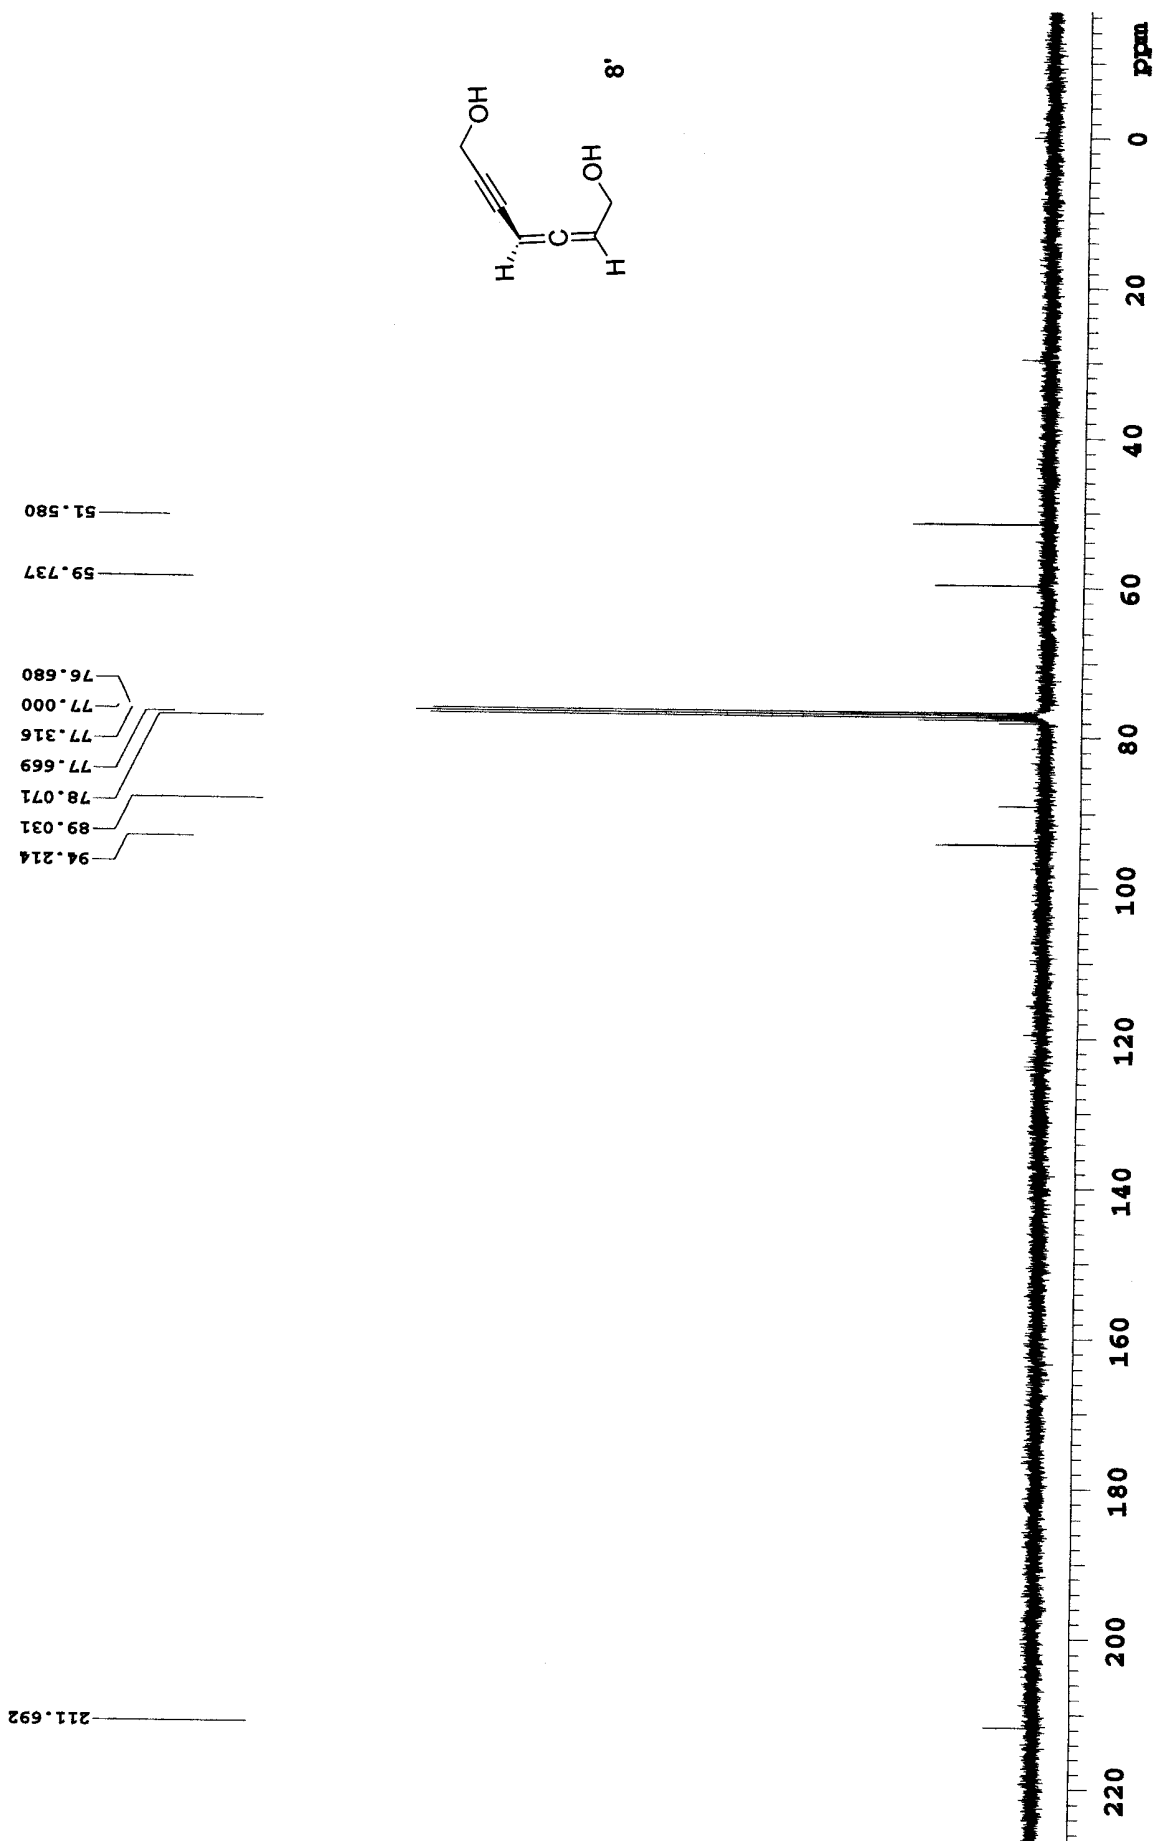

## 色谱分析报告

样品名称:

样品文件名: J-6-33. che

样品批号:

分析者:

分析日期: 2008-03-07

分析时间: 08:14

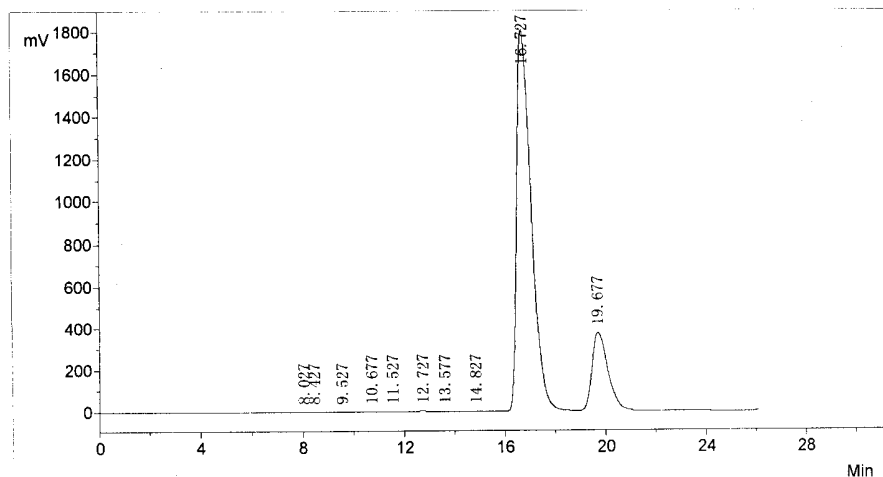

| 序号  | 峰号 | 组份名 | 保留时间   | 峰高        | 峰面积        | 面积百分比(%) |
|-----|----|-----|--------|-----------|------------|----------|
| 1   | 1  |     | 8.027  | 250.7     | 3905.3     | 0.0044   |
| 2   | 2  |     | 8.427  | 161.2     | 2654.7     | 0.0030   |
| 3   | 3  |     | 9.527  | 341.8     | 8946.4     | 0.0100   |
| 4   | 4  |     | 10.677 | 282.1     | 8755.5     | 0.0098   |
| 5   | 5  |     | 11.527 | 300.2     | 11461.3    | 0.0129   |
| 6   | 6  |     | 12.727 | 3915.9    | 89349.0    | 0.1002   |
| 7   | 7  |     | 13.577 | 2692.8    | 54926.0    | 0.0616   |
| 8   | 8  |     | 14.827 | 885.4     | 29865.3    | 0.0335   |
| 9   | 9  |     | 16.727 | 1800329.7 | 72489000.6 | 81.2883  |
| 10  | 10 |     | 19.677 | 374732.5  | 16476370.7 | 18.4764  |
| 合计: |    |     |        | 2183892.3 | 89175234.9 | 100.0000 |

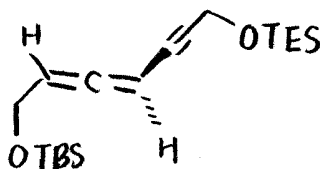

Chiral HPLC analysis of compound 7

# 色谱分析报告

样品名称:  
 样品批号:  
 分析日期:2008-03-18

样品文件名:J-6-42. che  
 分析者:  
 分析时间:10:54

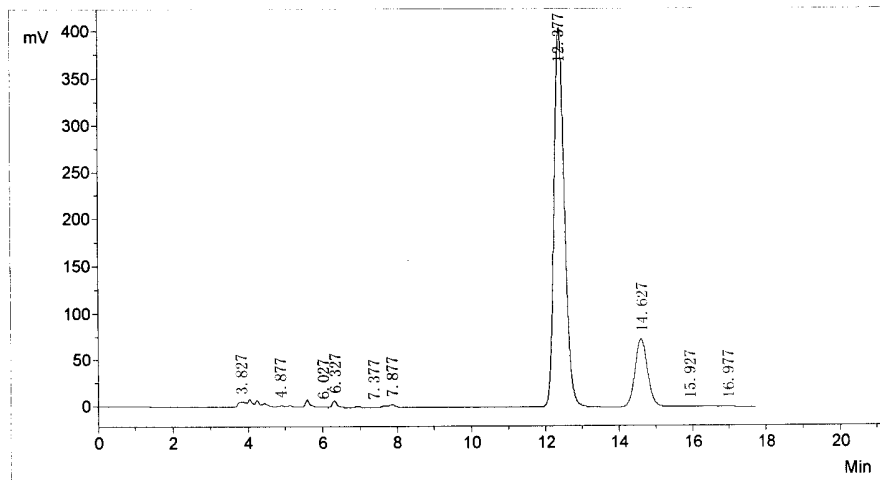

| No.   | PeakNo | ID. Name | R. Time | PeakHeight | PeakArea   | PerCent  |
|-------|--------|----------|---------|------------|------------|----------|
| 1     | 1      |          | 3.827   | 5716.0     | 263231.4   | 2.5785   |
| 2     | 2      |          | 4.877   | 1719.9     | 44668.2    | 0.4376   |
| 3     | 3      |          | 6.027   | 546.7      | 76807.4    | 0.7524   |
| 4     | 4      |          | 6.327   | 6992.8     | 68527.8    | 0.6713   |
| 5     | 5      |          | 7.377   | 83.2       | 5648.9     | 0.0553   |
| 6     | 6      |          | 7.877   | 2764.0     | 45509.5    | 0.4458   |
| 7     | 7      |          | 12.377  | 398685.9   | 7944950.1  | 77.8266  |
| 8     | 8      |          | 14.627  | 72902.0    | 1747136.5  | 17.1145  |
| 9     | 9      |          | 15.927  | 355.3      | 11659.1    | 0.1142   |
| 10    | 10     |          | 16.977  | 35.9       | 391.7      | 0.0038   |
| Total |        |          |         | 489801.8   | 10208530.6 | 100.0000 |

4.55 : 1

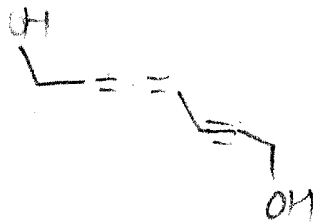

AS 8/2  
 新柱 基体分析

Chiral HPLC analysis of compound 8'
